# Supplementary material
Source: MDPI journal article supplement (https://www.mdpi.com/2304-6740/11/4/149)
Supplement: s1 [file s1]

## Supplementary Material

# How Metal Nuclearity Impacts Electrocatalytic H<sub>2</sub> Production in Thiocarbohydrazone-Based Complexes

Michael Papadakis <sup>1</sup>, Alexandre Barrozo <sup>1</sup>, Léa Delmotte <sup>1</sup>, Tatiana Straistari <sup>1</sup>, Sergiu Shova <sup>2</sup>, Marius Réglier <sup>1</sup>, Vera Krewald <sup>3</sup>, Sylvain Bertaina <sup>4</sup>, Renaud Hardré <sup>1</sup> and Maylis Orio <sup>1,\*</sup>

<sup>1</sup> Aix-Marseille Univ, CNRS, Centrale Marseille, iSm2, 13397 Marseille, France;

<sup>2</sup> Institute of Macromolecular Chemistry Petru Poni, 700487 Iasi, Romania

<sup>3</sup> Department of Chemistry, Theoretical Chemistry, Technical University Darmstadt, 64289 Darmstadt, Germany

<sup>4</sup> Aix-Marseille Univ, CNRS, IN2MP UMR 7334, 13397 Marseille, France

\* Correspondence: maylis.orio@univ-amu.fr

## Table of contents

|                                            |    |
|--------------------------------------------|----|
| 1. Synthesis and NMR characterization..... | 2  |
| 2. Single crystal X-ray Diffraction .....  | 5  |
| 3. UV-vis spectroscopic data .....         | 9  |
| 4. Electrochemical studies.....            | 14 |
| 5. Electrocatalysis.....                   | 17 |
| 6. Gas analysis .....                      | 19 |
| 7. Overpotential calculations .....        | 20 |
| 8. Kinetic analysis .....                  | 20 |
| 9. DFT calculations.....                   | 23 |

## 1. Synthesis and NMR Characterization

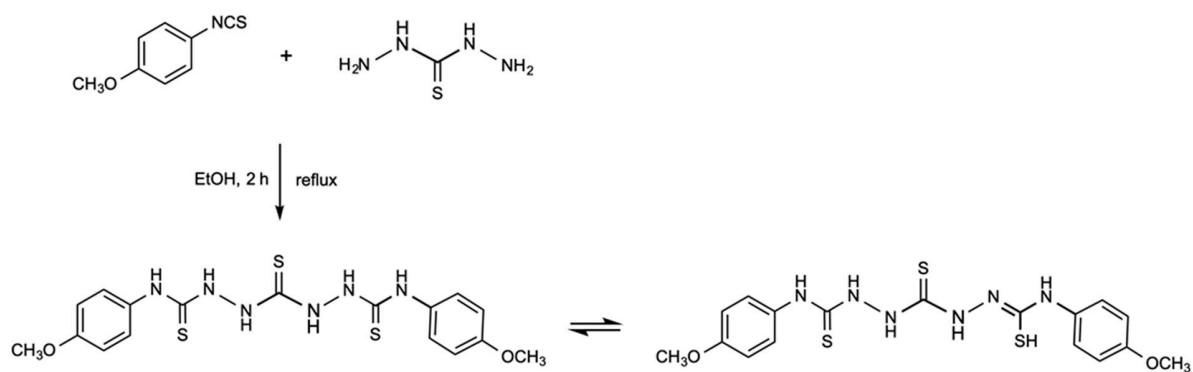

**Figure S1.** Synthetic protocol used for **H<sub>6</sub>L**.

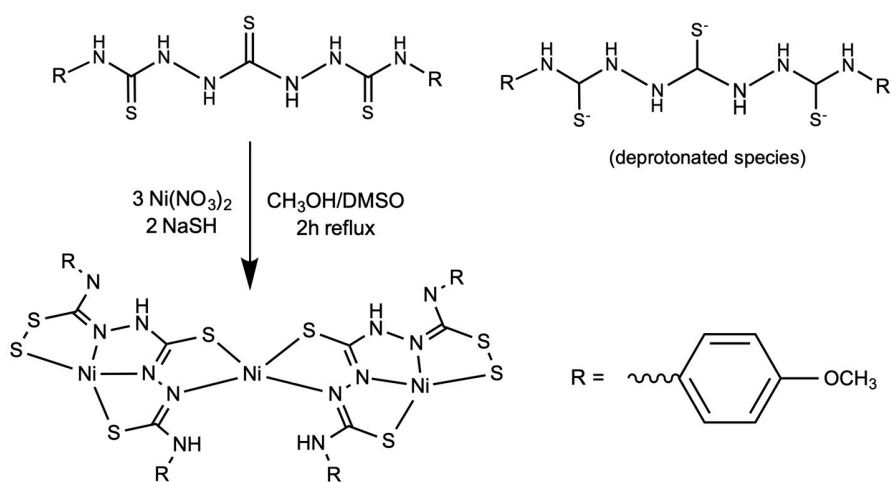

**Figure S2.** Synthetic protocol used for **Ni<sub>3</sub>L<sub>2</sub>**.

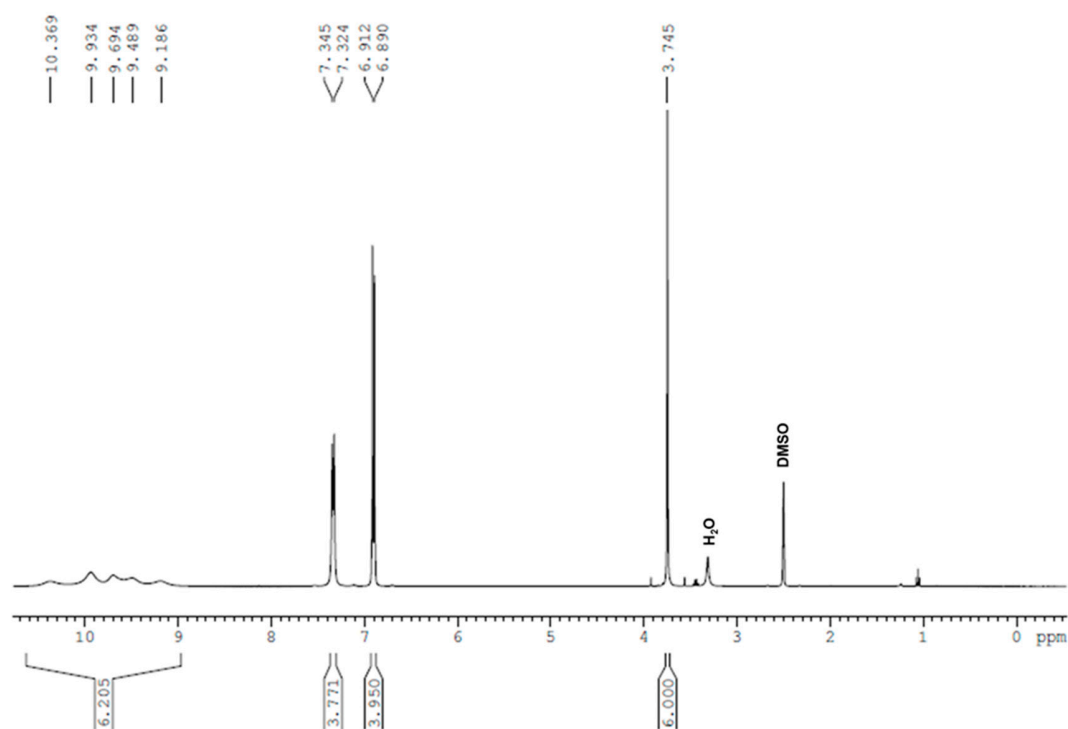

**Figure S3.** <sup>1</sup>H NMR spectrum and partial assignment for **H<sub>6</sub>L** in DMSO at 298 K.

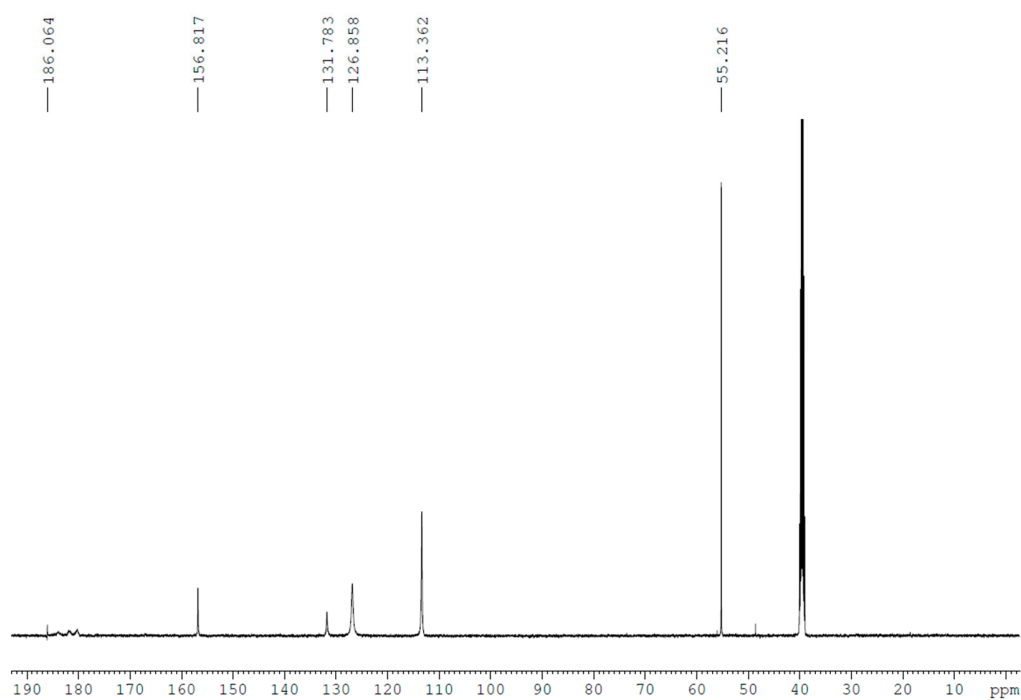

**Figure S4.** <sup>13</sup>C NMR spectrum and partial assignment for **H<sub>6</sub>L** in DMSO at 298 K.

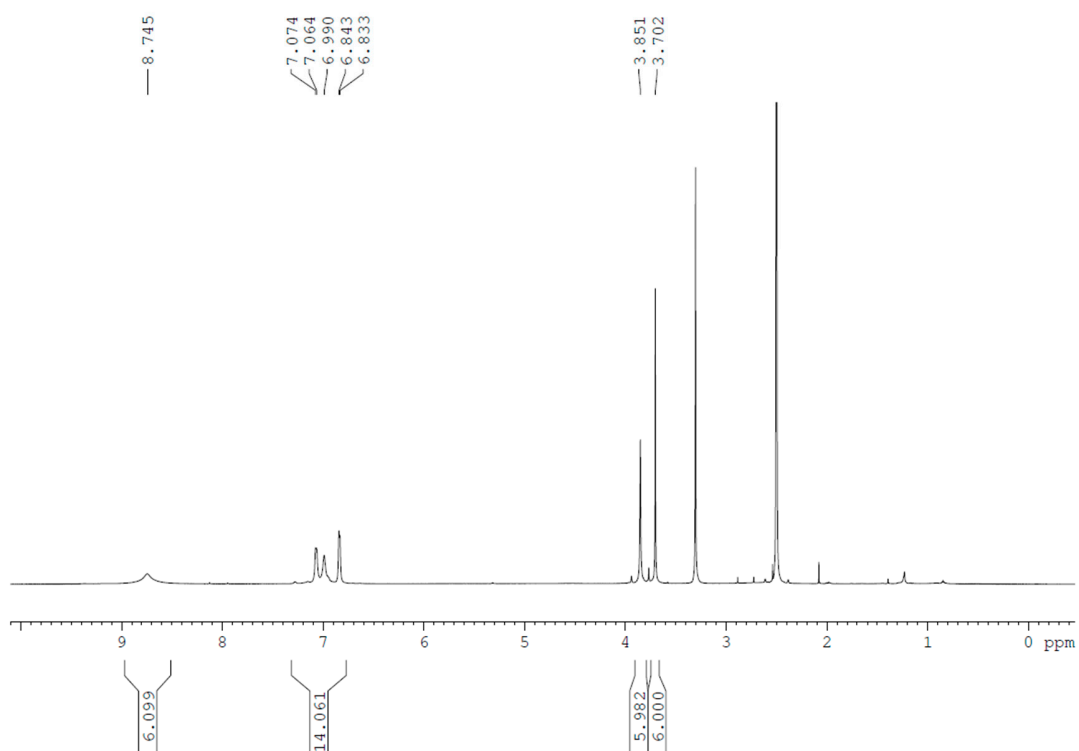

**Figure S5.**  $^1\text{H}$  NMR spectrum and partial assignment for  $\text{Ni}_3\text{L}_2$  in DMSO at 298 K.

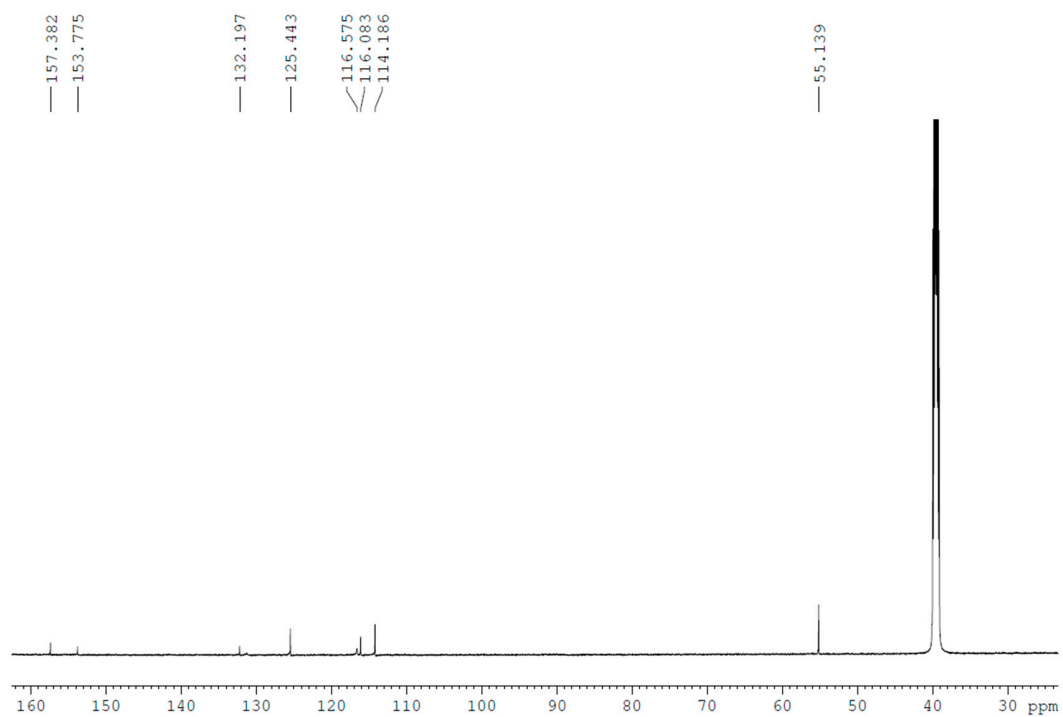

**Figure S6.**  $^{13}\text{C}$  NMR spectrum and partial assignment for  $\text{Ni}_3\text{L}_2$  in DMSO at 298 K.

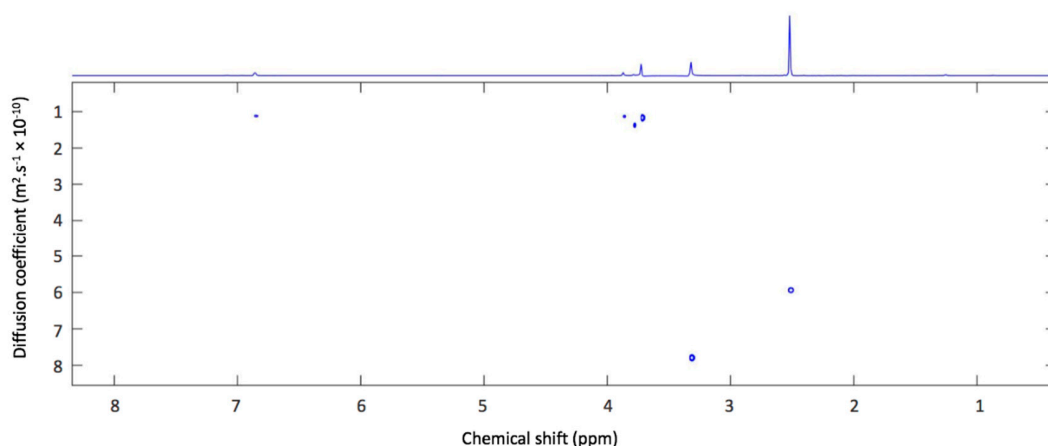

**Figure S7.** 2D DOSY spectrum for **Ni<sub>3</sub>L<sub>2</sub>** in DMF at 298 K processed using DOSY Toolbox (GNU General Public License) with 512 points for the self-diffusion axis.

## 2. Single crystal X-Ray diffraction

**Table S1.** Crystal data and details of data collection for **Ni<sub>3</sub>L<sub>2</sub>**.

|                                             |                                                                                                            |
|---------------------------------------------|------------------------------------------------------------------------------------------------------------|
| empirical formula                           | C <sub>41.33</sub> H <sub>57.33</sub> Ni <sub>3</sub> N <sub>12</sub> O <sub>8.33</sub> S <sub>11.67</sub> |
| Fw                                          | 1405.82                                                                                                    |
| space group                                 | C2/c                                                                                                       |
| <i>a</i> [Å]                                | 33.688(4)                                                                                                  |
| <i>b</i> [Å]                                | 30.5050(13)                                                                                                |
| <i>c</i> [Å]                                | 24.913(3)                                                                                                  |
| $\beta$ [°]                                 | 132.81(2)                                                                                                  |
| <i>V</i> [Å <sup>3</sup> ]                  | 18781(6)                                                                                                   |
| <i>Z</i>                                    | 12                                                                                                         |
| $\lambda$ [Å]                               | 0.71073                                                                                                    |
| $\rho_{\text{calcd}}$ [g cm <sup>-3</sup> ] | 1.492                                                                                                      |
| crystal size [mm]                           | 0.50 × 0.15 × 0.04                                                                                         |
| <i>T</i> [K]                                | 293(2)                                                                                                     |
| $\mu$ [mm <sup>-1</sup> ]                   | 1.338                                                                                                      |
| <i>R</i> <sub>1</sub> <sup>[a]</sup>        | 0.0624                                                                                                     |
| <i>wR</i> <sub>2</sub> <sup>[b]</sup>       | 0.1169                                                                                                     |
| GOF <sup>[c]</sup>                          | 0.818                                                                                                      |
| CCDC No.                                    | 2104371                                                                                                    |

<sup>a</sup>  $R_1 = \Sigma ||F_o| - |F_c|| / \Sigma |F_o|$ . <sup>b</sup>  $wR_2 = \{\Sigma[w(F_o^2 - F_c^2)^2] / \Sigma[w(F_o^2)^2]\}^{1/2}$ . <sup>c</sup> GOF =  $\{\Sigma[w(F_o^2 - F_c^2)^2] / (n - p)\}^{1/2}$ , where *n* is the number of reflections and *p* is the total number of parameters refined.

**Table S2.** Bond distances (Å) and angles (°) for **Ni<sub>3</sub>L<sub>2</sub>**.

|         |           |         |           |
|---------|-----------|---------|-----------|
| Ni1-S3  | 2.387(3)  | C13-C14 | 1.3900    |
| Ni1-S4  | 2.423(3)  | C14-C15 | 1.3900    |
| Ni1-O5  | 2.165(8)  | C15-C16 | 1.3900    |
| Ni1-O6  | 2.176(6)  | C16-C11 | 1.3900    |
| Ni1-N5  | 2.082(7)  | C23-C22 | 1.3900    |
| Ni1-N11 | 2.095(7)  | C23-C24 | 1.3900    |
| Ni2-S8  | 2.142(3)  | C22-C21 | 1.3900    |
| Ni2-S9  | 2.157(3)  | C21-C20 | 1.3900    |
| Ni2-N2  | 1.855(8)  | C20-C19 | 1.3900    |
| Ni2-N4  | 1.822(7)  | C19-C24 | 1.3900    |
| Ni3-S5  | 2.147(3)  | C33-C28 | 1.3900    |
| Ni3-S6  | 2.149(3)  | C33-C32 | 1.3900    |
| Ni3-N8  | 1.863(9)  | C28-C29 | 1.3900    |
| Ni3-N10 | 1.832(7)  | C29-C30 | 1.3900    |
| S1-O5   | 1.521(8)  | C30-C31 | 1.3900    |
| S1-C52  | 1.752(8)  | C31-C32 | 1.3900    |
| S1-C53  | 1.719(7)  | Ni4-S13 | 2.133(3)  |
| S2-O6   | 1.522(6)  | Ni4-S14 | 2.145(3)  |
| S2-C54  | 1.721(9)  | Ni4-N15 | 1.843(8)  |
| S2-C55  | 1.748(7)  | Ni4-N17 | 1.786(9)  |
| S3-C9   | 1.720(10) | Ni5-S11 | 2.392(3)  |
| S4-C26  | 1.714(9)  | Ni5-O9  | 2.131(6)  |
| S5-C25  | 1.751(9)  | Ni5-N14 | 2.137(9)  |
| S6-S7   | 2.077(4)  | S11-C43 | 1.720(10) |
| S7-C27  | 1.730(10) | S12-O9  | 1.511(6)  |
| S8-C10  | 1.778(8)  | S12-C56 | 1.769(8)  |
| S9-S10  | 2.057(4)  | S12-C57 | 1.779(7)  |
| S10-C8  | 1.730(11) | S13-C42 | 1.773(11) |
| O1-C1   | 1.385(11) | S14-S15 | 2.045(4)  |
| O1-C2   | 1.367(8)  | S15-C44 | 1.769(10) |
| O2-C14  | 1.350(9)  | O7-C35  | 1.402(11) |
| O2-C17  | 1.432(11) | O7-C36  | 1.418(10) |
| O3-C18  | 1.432(10) | O8-C48  | 1.371(7)  |
| O3-C19  | 1.402(8)  | O8-C51  | 1.440(10) |
| O4-C31  | 1.375(8)  | N13-C39 | 1.374(9)  |
| O4-C34  | 1.411(12) | N13-C42 | 1.313(11) |
| N1-C5   | 1.401(8)  | N14-N15 | 1.384(10) |
| N1-C8   | 1.351(11) | N14-C42 | 1.278(11) |
| N2-N3   | 1.436(9)  | N15-C43 | 1.288(11) |
| N2-C8   | 1.279(10) | N16-N17 | 1.412(8)  |
| N3-C9   | 1.381(10) | N16-C43 | 1.367(9)  |
| N4-N5   | 1.382(9)  | N17-C44 | 1.345(10) |
| N4-C9   | 1.299(10) | N18-C44 | 1.356(11) |

|         |           |         |           |
|---------|-----------|---------|-----------|
| N5-C10  | 1.309(10) | N18-C45 | 1.411(7)  |
| N6-C10  | 1.307(10) | C39-C38 | 1.3900    |
| N6-C11  | 1.384(8)  | C39-C40 | 1.3900    |
| N7-C27  | 1.356(10) | C38-C37 | 1.3900    |
| N7-C28  | 1.454(8)  | C37-C36 | 1.3900    |
| N8-N9   | 1.369(9)  | C36-C41 | 1.3900    |
| N8-C27  | 1.303(10) | C41-C40 | 1.3900    |
| N9-C26  | 1.351(9)  | C49-C50 | 1.3900    |
| N10-N11 | 1.423(8)  | C49-C48 | 1.3900    |
| N10-C26 | 1.286(10) | C50-C45 | 1.3900    |
| N11-C25 | 1.312(10) | C45-C46 | 1.3900    |
| N12-C22 | 1.355(8)  | C46-C47 | 1.3900    |
| N12-C25 | 1.355(10) | C47-C48 | 1.3900    |
| C4-C5   | 1.3900    | S16-O10 | 1.431(8)  |
| C4-C3   | 1.3900    | S16-C58 | 1.602(8)  |
| C5-C6   | 1.3900    | S16-C59 | 1.660(8)  |
| C6-C7   | 1.3900    | S17-O11 | 1.358(9)  |
| C7-C2   | 1.3900    | S17-C60 | 1.644(10) |
| C2-C3   | 1.3900    | S17-C61 | 1.676(10) |
| C12-C13 | 1.3900    | S18-O12 | 1.404(11) |
| C12-C11 | 1.3900    | S18-C62 | 1.718(10) |

|            |            |             |           |
|------------|------------|-------------|-----------|
| S3-Ni1-S4  | 100.45(11) | C22-C23-C24 | 120.0     |
| O5-Ni1-S3  | 168.0(9)   | N12-C22-C23 | 120.5(7)  |
| O5-Ni1-S4  | 91.3(8)    | N12-C22-C21 | 119.5(7)  |
| O6-Ni1-S3  | 86.87(18)  | C20-C21-C22 | 120.0     |
| O6-Ni1-S4  | 171.97(17) | C21-C20-C19 | 120.0     |
| O6-Ni1-O5  | 81.5(8)    | O3-C19-C20  | 124.6(7)  |
| N5-Ni1-S3  | 83.7(3)    | O3-C19-C24  | 115.4(7)  |
| N5-Ni1-S4  | 96.1(2)    | C24-C19-C20 | 120.0     |
| N5-Ni1-O5  | 93.0(7)    | C19-C24-C23 | 120.0     |
| N5-Ni1-O6  | 87.9(3)    | N11-C25-S5  | 120.7(8)  |
| N5-Ni1-N11 | 176.4(4)   | N11-C25-N12 | 121.3(9)  |
| N11-Ni1-S3 | 93.1(2)    | N12-C25-S5  | 117.8(8)  |
| N11-Ni1-S4 | 82.7(3)    | N9-C26-S4   | 121.0(8)  |
| N11-Ni1-O5 | 90.5(7)    | N10-C26-S4  | 124.9(8)  |
| N11-Ni1-O6 | 93.7(3)    | N10-C26-N9  | 114.0(8)  |
| S8-Ni2-S9  | 97.78(12)  | N7-C27-S7   | 116.5(9)  |
| N2-Ni2-S8  | 171.0(3)   | N8-C27-S7   | 121.1(9)  |
| N2-Ni2-S9  | 91.2(3)    | N8-C27-N7   | 122.2(10) |
| N4-Ni2-S8  | 85.9(3)    | C28-C33-C32 | 120.0     |
| N4-Ni2-S9  | 176.3(4)   | C33-C28-N7  | 117.8(9)  |
| N4-Ni2-N2  | 85.1(4)    | C29-C28-N7  | 122.0(9)  |
| S5-Ni3-S6  | 96.64(12)  | C29-C28-C33 | 120.0     |

|             |            |                           |            |
|-------------|------------|---------------------------|------------|
| N8-Ni3-S5   | 168.8(3)   | C28-C29-C30               | 120.0      |
| N8-Ni3-S6   | 94.2(3)    | C29-C30-C31               | 120.0      |
| N10-Ni3-S5  | 88.1(3)    | O4-C31-C30                | 116.9(9)   |
| N10-Ni3-S6  | 174.5(3)   | O4-C31-C32                | 122.9(9)   |
| N10-Ni3-N8  | 80.9(4)    | C32-C31-C30               | 120.0      |
| O5-S1-C52   | 102.0(8)   | C31-C32-C33               | 120.0      |
| O5-S1-C53   | 109.0(14)  | S13-Ni4-S14               | 97.45(13)  |
| C53-S1-C52  | 96.0(5)    | N15-Ni4-S13               | 85.7(3)    |
| O6-S2-C54   | 103.8(4)   | N15-Ni4-S14               | 176.5(4)   |
| O6-S2-C55   | 105.6(4)   | N17-Ni4-S13               | 169.7(3)   |
| C54-S2-C55  | 98.3(5)    | N17-Ni4-S14               | 92.8(3)    |
| C9-S3-Ni1   | 93.2(4)    | N17-Ni4-N15               | 84.0(4)    |
| C26-S4-Ni1  | 94.8(4)    | S11-Ni5-S11 <sup>1</sup>  | 98.52(17)  |
| C25-S5-Ni3  | 96.5(4)    | O9-Ni5-S11                | 172.05(19) |
| S7-S6-Ni3   | 99.87(15)  | O9-Ni5-S11 <sup>1</sup>   | 88.38(19)  |
| C27-S7-S6   | 100.9(4)   | O9 <sup>1</sup> -Ni5-O9   | 85.0(4)    |
| C10-S8-Ni2  | 97.0(4)    | N14-Ni5-S11               | 85.2(3)    |
| S10-S9-Ni2  | 100.40(15) | N14-Ni5-S11 <sup>1</sup>  | 94.7(2)    |
| C8-S10-S9   | 102.0(4)   | N14-Ni5-O9                | 90.4(3)    |
| C2-O1-C1    | 119.2(10)  | N14-Ni5-O9 <sup>1</sup>   | 89.8(3)    |
| C14-O2-C17  | 119.7(10)  | N14 <sup>1</sup> -Ni5-N14 | 179.7(5)   |
| C19-O3-C18  | 114.8(9)   | C43-S11-Ni5               | 92.3(4)    |
| C31-O4-C34  | 116.9(10)  | O9-S12-C56                | 103.6(4)   |
| S1-O5-Ni1   | 121.1(6)   | O9-S12-C57                | 105.1(4)   |
| S2-O6-Ni1   | 124.4(4)   | C56-S12-C57               | 99.9(5)    |
| C8-N1-C5    | 124.7(9)   | C42-S13-Ni4               | 97.8(5)    |
| N3-N2-Ni2   | 110.9(6)   | S15-S14-Ni4               | 100.97(16) |
| C8-N2-Ni2   | 129.2(9)   | C44-S15-S14               | 101.8(4)   |
| C8-N2-N3    | 119.9(9)   | C35-O7-C36                | 110.9(10)  |
| C9-N3-N2    | 112.5(9)   | C48-O8-C51                | 116.5(8)   |
| N5-N4-Ni2   | 125.4(7)   | S12-O9-Ni5                | 126.9(4)   |
| C9-N4-Ni2   | 116.4(8)   | C42-N13-C39               | 125.4(9)   |
| C9-N4-N5    | 118.2(8)   | N15-N14-Ni5               | 112.1(7)   |
| N4-N5-Ni1   | 116.5(6)   | C42-N14-Ni5               | 133.4(8)   |
| C10-N5-Ni1  | 130.8(7)   | C42-N14-N15               | 114.5(10)  |
| C10-N5-N4   | 112.2(8)   | N14-N15-Ni4               | 123.4(7)   |
| C10-N6-C11  | 125.9(8)   | C43-N15-Ni4               | 115.0(8)   |
| C27-N7-C28  | 121.8(9)   | C43-N15-N14               | 121.6(10)  |
| N9-N8-Ni3   | 114.3(6)   | C43-N16-N17               | 110.6(8)   |
| C27-N8-Ni3  | 123.8(8)   | N16-N17-Ni4               | 114.5(5)   |
| C27-N8-N9   | 121.9(9)   | C44-N17-Ni4               | 129.8(7)   |
| C26-N9-N8   | 112.4(8)   | C44-N17-N16               | 115.8(9)   |
| N11-N10-Ni3 | 121.4(6)   | C44-N18-C45               | 126.2(9)   |
| C26-N10-Ni3 | 118.1(7)   | N13-C39-C38               | 118.0(8)   |



|             |           |             |           |
|-------------|-----------|-------------|-----------|
| C26-N10-N11 | 120.4(8)  | N13-C39-C40 | 121.8(8)  |
| N10-N11-Ni1 | 115.4(6)  | C38-C39-C40 | 120.0     |
| C25-N11-Ni1 | 131.1(7)  | C39-C38-C37 | 120.0     |
| C25-N11-N10 | 113.3(8)  | C38-C37-C36 | 120.0     |
| C25-N12-C22 | 125.4(7)  | C37-C36-O7  | 113.0(8)  |
| C5-C4-C3    | 120.0     | C41-C36-O7  | 127.0(8)  |
| C4-C5-N1    | 121.4(7)  | C41-C36-C37 | 120.0     |
| C4-C5-C6    | 120.0     | C36-C41-C40 | 120.0     |
| C6-C5-N1    | 118.5(7)  | C41-C40-C39 | 120.0     |
| C7-C6-C5    | 120.0     | N13-C42-S13 | 120.5(10) |
| C6-C7-C2    | 120.0     | N14-C42-S13 | 118.5(10) |
| O1-C2-C7    | 123.2(7)  | N14-C42-N13 | 120.9(12) |
| O1-C2-C3    | 116.7(7)  | N15-C43-S11 | 127.7(8)  |
| C3-C2-C7    | 120.0     | N15-C43-N16 | 115.6(10) |
| C2-C3-C4    | 120.0     | N16-C43-S11 | 116.7(9)  |
| N1-C8-S10   | 119.2(8)  | N17-C44-S15 | 114.6(9)  |
| N2-C8-S10   | 117.0(10) | N18-C44-S15 | 117.8(8)  |
| N2-C8-N1    | 123.8(10) | N18-C44-N17 | 127.5(10) |
| N3-C9-S3    | 117.8(10) | C50-C49-C48 | 120.0     |
| N4-C9-S3    | 127.0(8)  | C45-C50-C49 | 120.0     |
| N4-C9-N3    | 115.0(10) | N18-C45-C50 | 122.2(8)  |
| N5-C10-S8   | 119.1(8)  | N18-C45-C46 | 117.7(8)  |
| N5-C10-N6   | 122.8(9)  | C46-C45-C50 | 120.0     |
| N6-C10-S8   | 118.1(9)  | C45-C46-C47 | 120.0     |
| C13-C12-C11 | 120.0     | C46-C47-C48 | 120.0     |
| C14-C13-C12 | 120.0     | O8-C48-C49  | 117.2(8)  |
| O2-C14-C13  | 114.4(10) | O8-C48-C47  | 122.8(8)  |
| O2-C14-C15  | 125.6(10) | C47-C48-C49 | 120.0     |
| C13-C14-C15 | 120.0     | O10-S16-C58 | 101.7(8)  |
| C16-C15-C14 | 120.0     | O10-S16-C59 | 112.3(7)  |
| C11-C16-C15 | 120.0     | C58-S16-C59 | 98.8(8)   |
| N6-C11-C12  | 119.9(10) | O11-S17-C60 | 121.6(14) |
| N6-C11-C16  | 120.1(10) | O11-S17-C61 | 106.9(14) |
| C16-C11-C12 | 120.0     | C60-S17-C61 | 94.3(16)  |

Symmetry codes: <sup>1</sup>)2 – x, y, 1.5 – z.

### 3. UV-vis spectroscopic data

**Table S3.** Selected features of the electronic absorption spectra of **H<sub>6</sub>L** and **Ni<sub>3</sub>L<sub>2</sub>** in DMF.

| Compound                           | $\lambda$ (nm) | $\epsilon$ (M <sup>-1</sup> cm <sup>-1</sup> ) | $\lambda$ (nm) | $\epsilon$ (M <sup>-1</sup> cm <sup>-1</sup> ) | $\lambda$ (nm) | $\epsilon$ (M <sup>-1</sup> cm <sup>-1</sup> ) | $\lambda$ (nm) | $\epsilon$ (M <sup>-1</sup> cm <sup>-1</sup> ) |
|------------------------------------|----------------|------------------------------------------------|----------------|------------------------------------------------|----------------|------------------------------------------------|----------------|------------------------------------------------|
| <b>H<sub>6</sub>L</b>              | 270            | 22829.63                                       | 325            | 13616.20                                       | -              | -                                              | -              | -                                              |
| <b>Ni<sub>3</sub>L<sub>2</sub></b> | 268            | 55638.60                                       | 363            | 19165.52                                       | 518            | 4203.65                                        | 895            | 1391.34                                        |

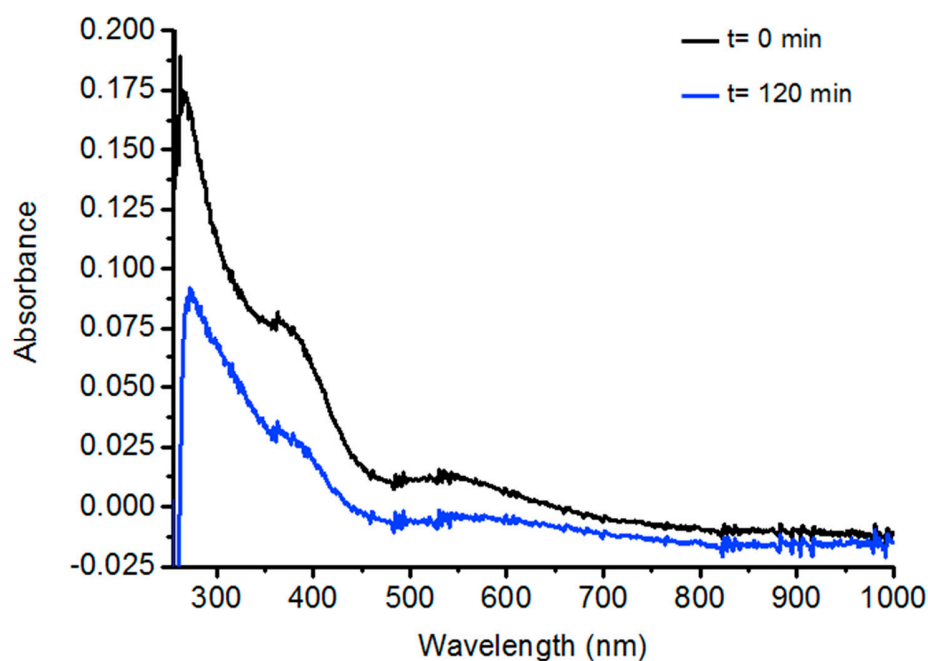

**Figure S8.** Electronic absorption spectra for the **Ni<sub>3</sub>L<sub>2</sub>** complex (black line), and upon chronoamperometry (-1.7 V vs. Fc<sup>+/0</sup> with 100 mM of TFA, blue line).

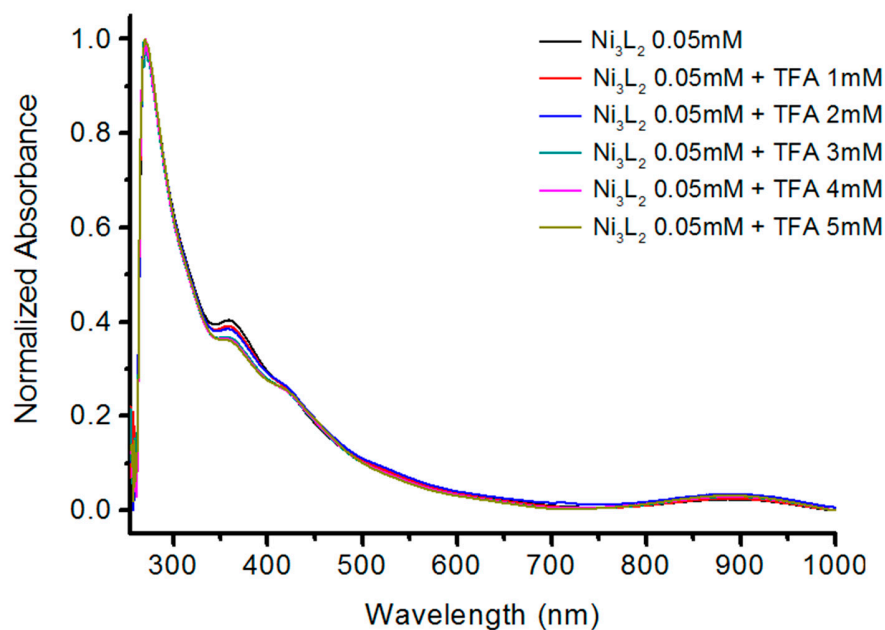

**Figure S9.** Electronic absorption spectra of 0.5 mM solutions of **Ni<sub>3</sub>L<sub>2</sub>** in DMF in the absence (black line) or in the presence (red, blue green, pink and khaki lines) of TFA.

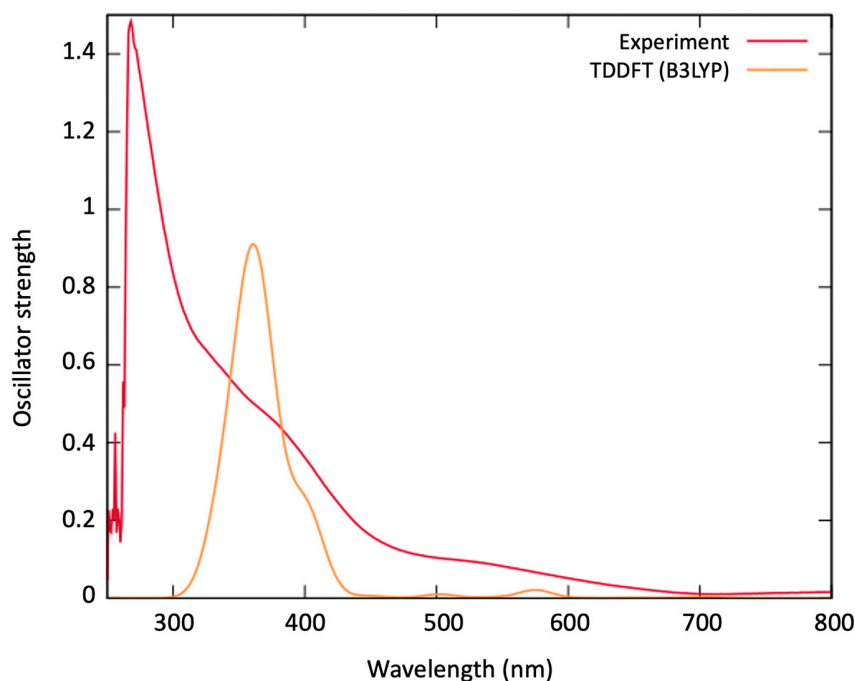

**Figure S10.** Comparison between experimental and calculated UV-Vis spectra for **Ni<sub>3</sub>L<sub>2</sub>** in DMF. Calculations performed on the neutral complex in a closed-shell singlet state (B3LYP/def2-TZVP(-f), see Electronic structure section in the main text).

**Table S4.** Selected intense transitions in the calculated UV-vis spectra of **Ni<sub>3</sub>L<sub>2</sub>** and their assignment with difference densities (yellow: density loss, red: density gain; CT: charge transfer, MMCT: metal-to-metal CT, LMCT: ligand-to-metal CT, MLCT: metal-to-ligand CT; d → d: local excitation on the metals, L → L: local excitation on the ligands, see Figure S11 for depictions).

| State | Wavelength / nm<br>[Energy / cm <sup>-1</sup> ] | Oscillator strength | Assignment |
|-------|-------------------------------------------------|---------------------|------------|
| 27    | 575.7<br>[17370.3]                              | 0.00778             | MMCT/LMCT  |
| 29    | 572.9<br>[17456.4]                              | 0.00262             | MMCT/LMCT  |
| 39    | 502.9<br>[19885.6]                              | 0.00465             | LMCT       |
| 43    | 406.9<br>[24574.0]                              | 0.01930             | d → d      |
| 47    | 402.6<br>[24836.3]                              | 0.02563             | L → L      |

|     |                    |         |           |
|-----|--------------------|---------|-----------|
| 62  | 381.6<br>[26208.9] | 0.01881 | LMCT      |
| 67  | 397.3<br>[25172.8] | 0.04436 | MMCT      |
| 70  | 366.2<br>[27305.3] | 0.18733 | MMCT      |
| 74  | 371.8<br>[26893.9] | 0.04887 | LMCT/MMCT |
| 78  | 360.6<br>[27732.2] | 0.02336 | LMCT/MMCT |
| 80  | 359.5<br>[27817.2] | 0.03117 | LMCT/MMCT |
| 81  | 356.4<br>[28057.5] | 0.02606 | MLCT      |
| 87  | 353.9<br>[28260.5] | 0.15136 | MLCT      |
| 97  | 337.7<br>[29616.3] | 0.05810 | MLCT      |
| 100 | 334.9<br>[29860.3] | 0.03976 | MLCT/MMCT |

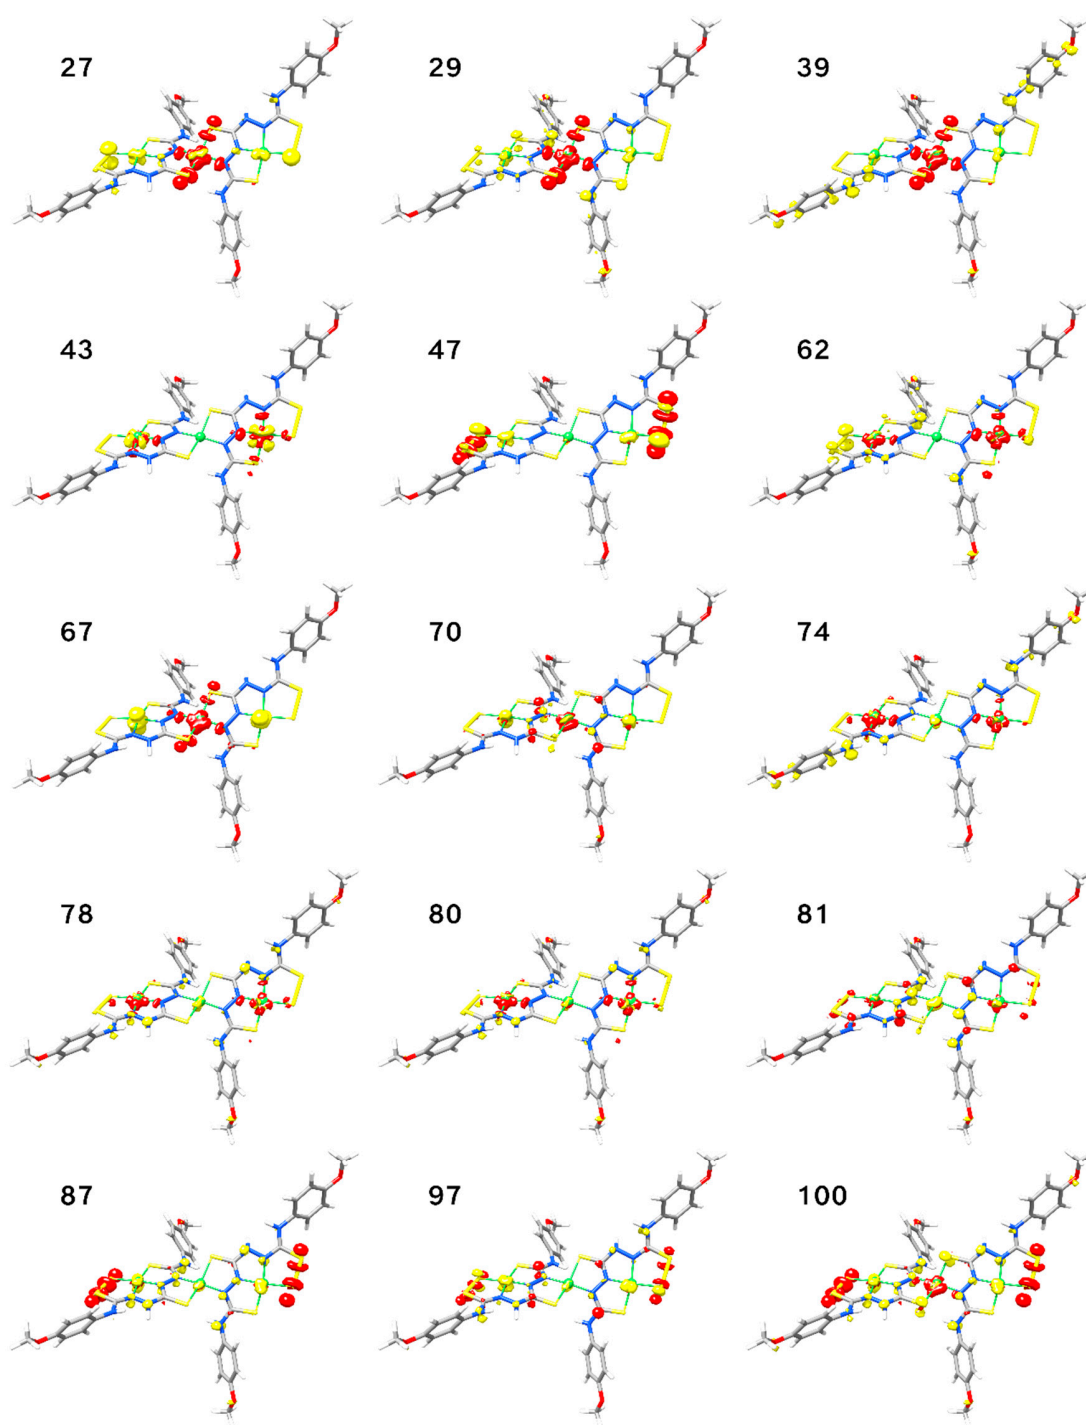

**Figure S11.** Difference densities of the most important transitions of  $\text{Ni}_3\text{L}_2$  predicted with TDDFT (B3LYP/def2-TZVP(-f); yellow: density loss, red: density gain) listed in Table S4.

#### 4. Electrochemical Studies

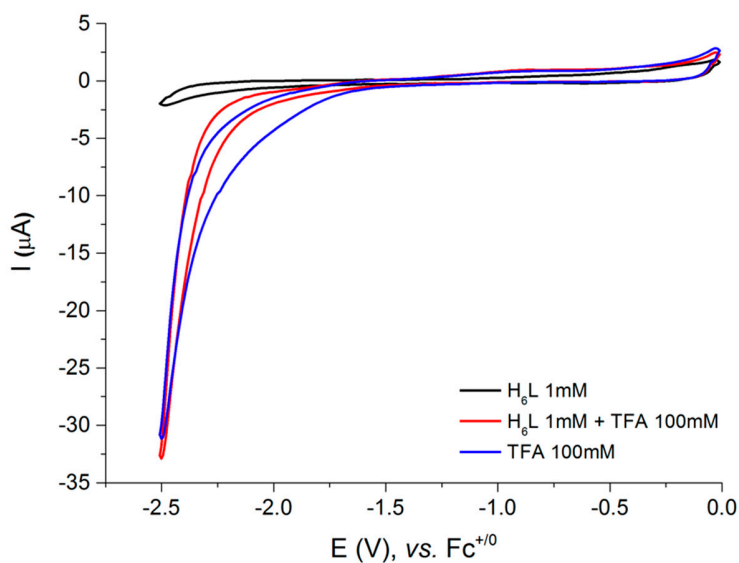

**Figure S12.** Cyclic voltammogram of a 1 mM solution of  $\text{H}_6\text{L}$  (black line) in DMF recorded at a stationary glassy carbon with 0.1 M  $\text{NBu}_4\text{PF}_6$  as supporting electrolyte. The cyclic voltammograms of a 100 mM of TFA solution in the absence (blue line) and in the presence (red line) of 1 mM  $\text{H}_6\text{L}$  are also shown. Scan rate:  $500 \text{ mV s}^{-1}$ . Potentials are referenced to the  $\text{Fc}^{+/0}$  electrode.

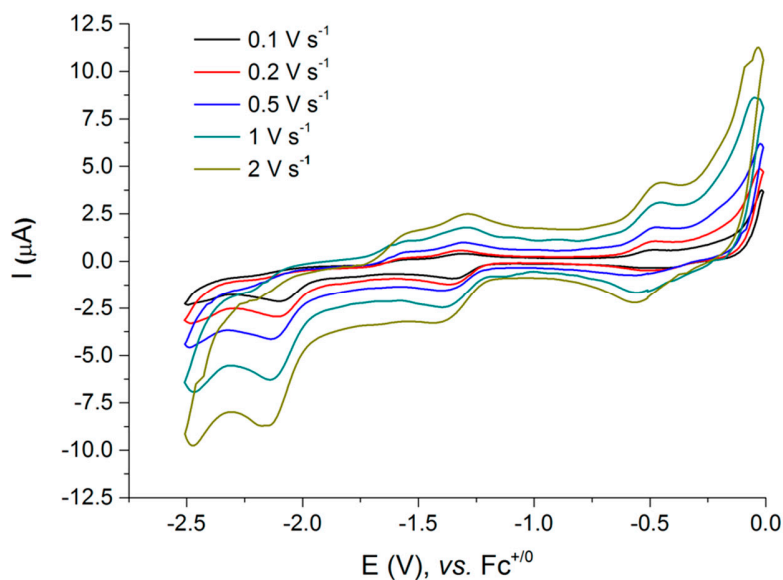

**Figure S13.** Successive cyclic voltammograms of a 1 mM solution of  $\text{Ni}_3\text{L}_2$  in DMF at a stationary glassy carbon electrode at different scan rates ( $v$ ) in DMF with 0.1 M  $\text{NBu}_4\text{PF}_6$  as supporting electrolyte. Potentials are referenced to the  $\text{Fc}^{+/0}$  electrode.

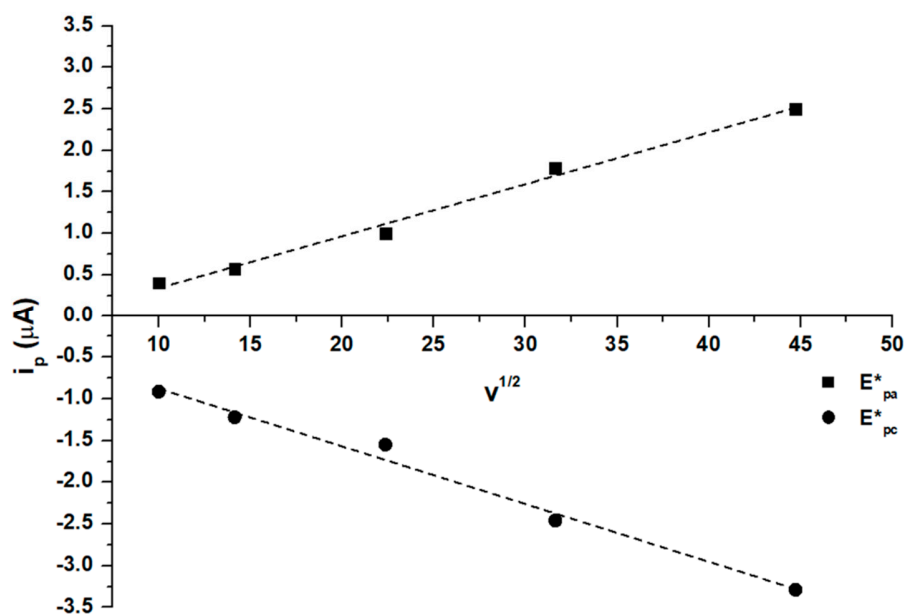

**Figure S14.** Linear plot of  $i_p$  versus the square root of the scan rate  $v^{1/2}$  for anodic and cathodic waves of the quasi-reversible redox process of **Ni<sub>3</sub>L<sub>2</sub>**.

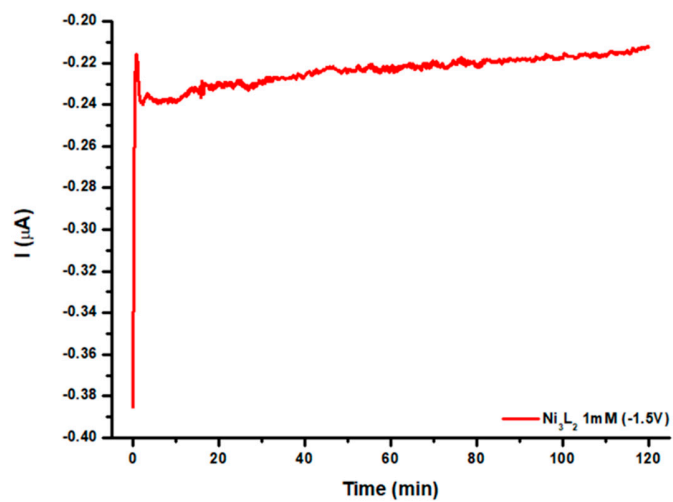

**Figure S15.** Chronoamperogram of a 1 mM solution of **Ni<sub>3</sub>L<sub>2</sub>** in DMF recorded at -1.50 V vs.  $\text{Fc}^{+/0}$  at 1 mm glassy carbon electrode.

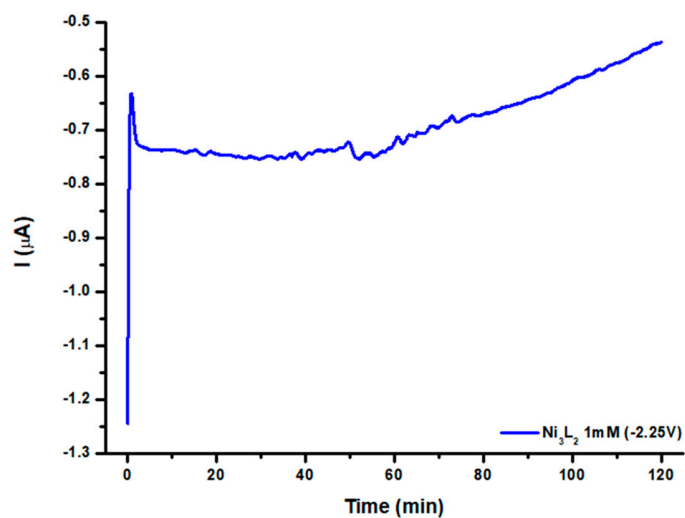

**Figure S16.** Chronoamperogram of a 1 mM solution of  $\text{Ni}_3\text{L}_2$  in DMF recorded at -2.25 V vs.  $\text{Fc}^{+/0}$  at 1 mm glassy carbon electrode.

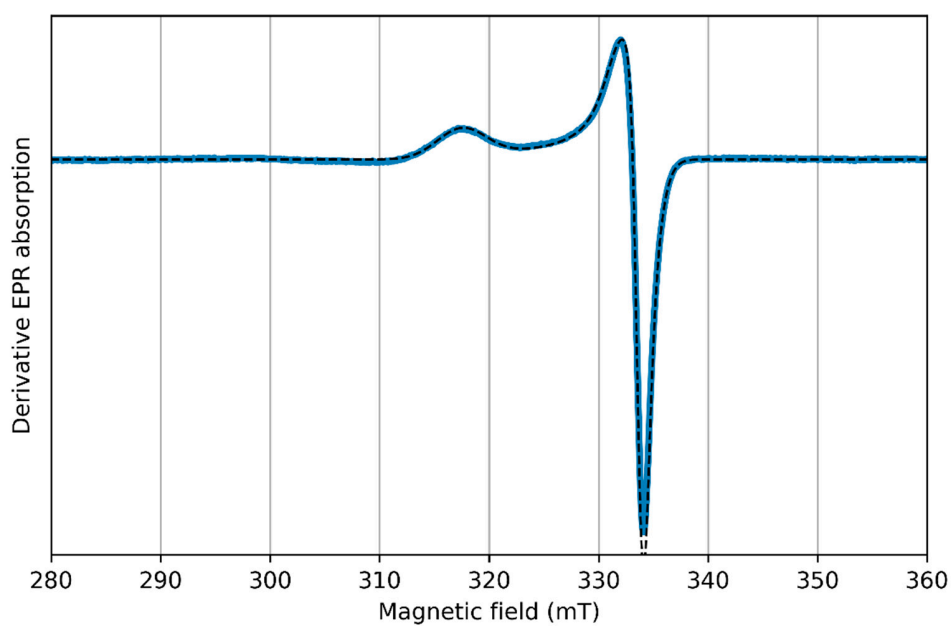

**Figure S17.** Simulated (blue line) and experimental (dotted line) cw X-band EPR spectrum of a 1 mM solution of  $\text{Ni}_3\text{L}_2$  in DMF at  $T=50\text{K}$  recorded upon chronoamperometry at -1.50 V vs.  $\text{Fc}^{+/0}$  at 1 mm glassy carbon electrode.



## 5. Electrocatalysis

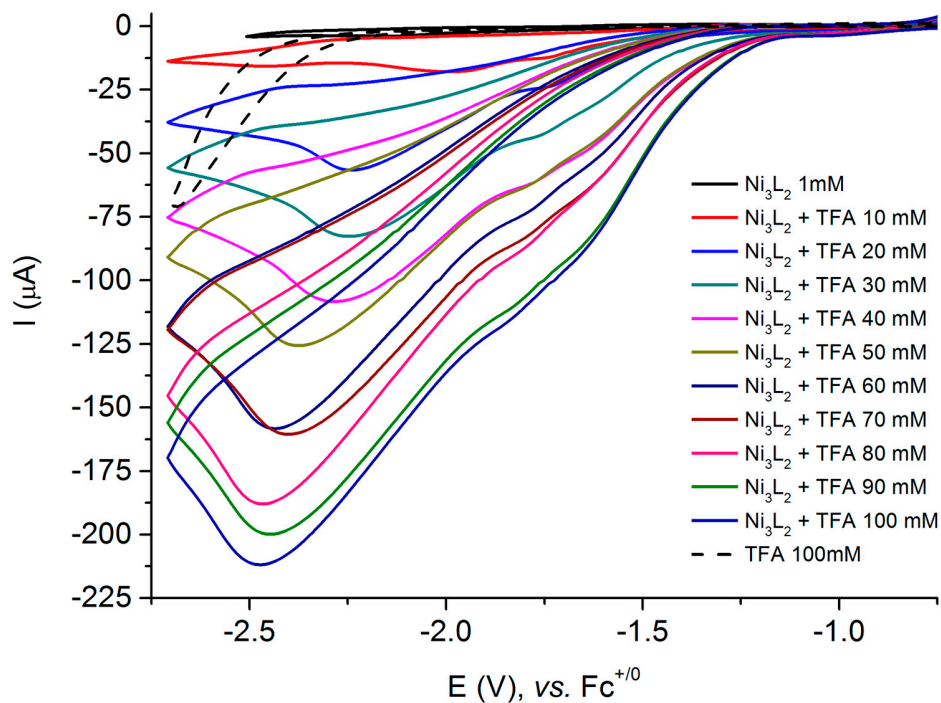

**Figure S18.** Successive cyclic voltammograms of a 1 mM solution of  $\text{Ni}_3\text{L}_2$  in DMF (0.1 M  $\text{NBu}_4\text{PF}_6$ ) recorded at a glassy carbon electrode with increasing amounts of TFA at  $500 \text{ mV s}^{-1}$ . Potential are referenced to the  $\text{Fc}^{+/0}$  electrode.

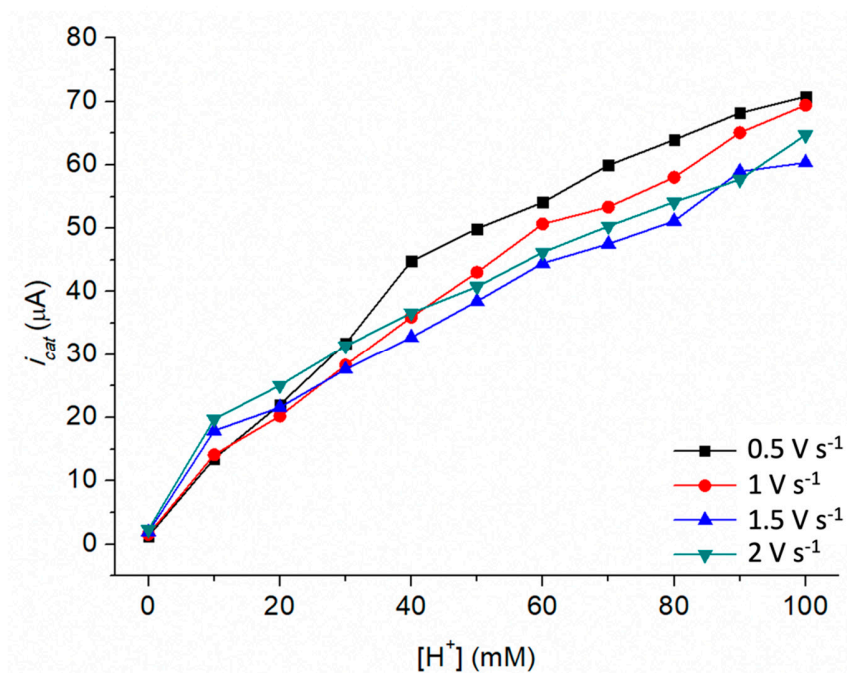

**Figure S19.** Plot of  $i_{cat}$  of **Ni<sub>3</sub>L<sub>2</sub>** for increasing concentrations of TFA at different scan rates.

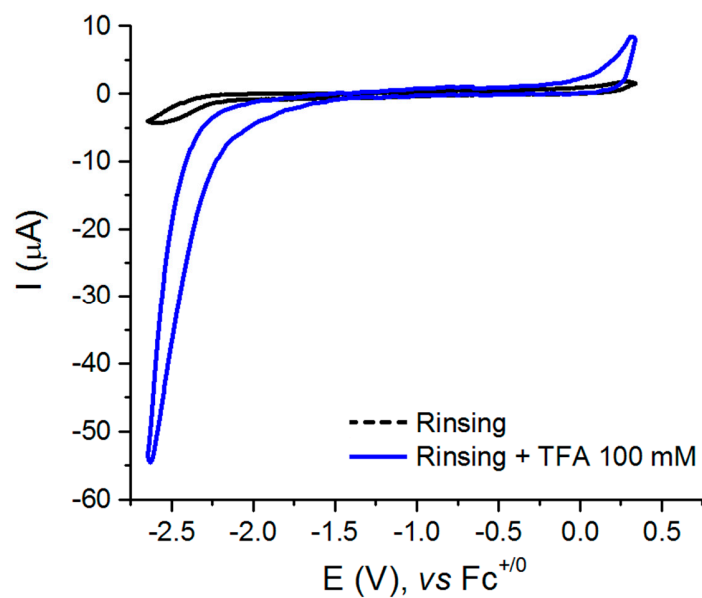

**Figure S20.** Cyclic voltammograms recorded after electrocatalysis of **Ni<sub>3</sub>L<sub>2</sub>** upon washing the working electrode and immersion into a fresh solution of dry DMF (0.1M NBu<sub>4</sub>PF<sub>6</sub>, black dashed line) and in the presence of 100 mM of TFA (blue line). Scan rate 500 mV s<sup>-1</sup>.

## 6. Gas analysis

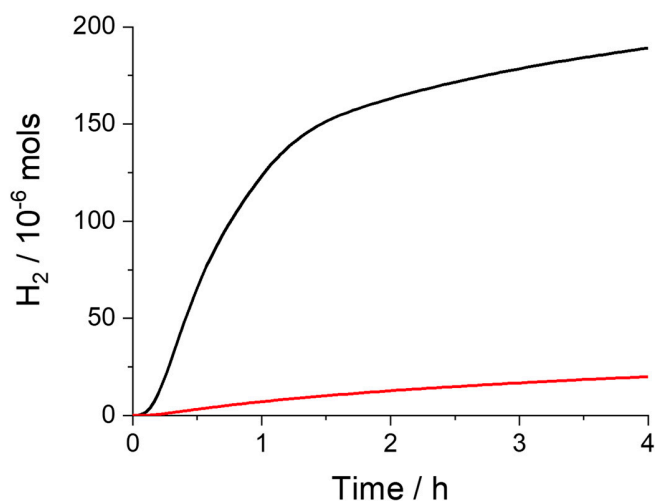

**Figure S21.** Electrocatalytic hydrogen production vs. time, by applying  $-1.70$  V vs.  $\text{Fc}^{+/0}$  using a mercury pool working electrode in  $0.1$  M  $\text{NBu}_4\text{PF}_6$  solution of DMF containing  $100$  mM TFA in the absence (red line) and presence of  $1$  mM of  $\text{Ni}_3\text{L}_2$  (black line).

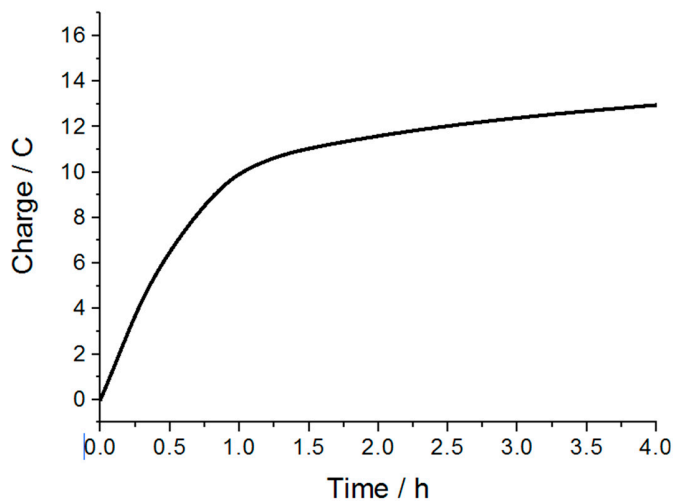

**Figure S22.** Coulometry during bulk electrolysis experiment at  $-1.70$  V vs.  $\text{Fc}^{+/0}$  using a mercury pool working electrode. The electrolytic solution contains  $0.1$  M  $\text{NBu}_4\text{PF}_6$  in DMF,  $100$  mM TFA and  $1$  mM of  $\text{Ni}_3\text{L}_2$ .

## 7. Overpotential calculations

The overpotential value of **Ni<sub>3</sub>L<sub>2</sub>**,  $\eta$ , was determined following the protocol described by Fourmond et coworkers. This parameter is calculated as the difference between the mid-wave catalytic potential  $E_{1/2}^{cat}$  and the theoretical half-wave potential  $E_{1/2}^T$  such as:

$$\eta = E_{1/2}^{cat} - E_{1/2}^T \quad (1)$$

The value of  $E_{1/2}^T$  depends on the standard potential for the reduction of protons in DMF  $E_{H^+/H_2}^0$ , the  $pK_a$  the proton source, the total concentration of the acid  $C_0$ , the concentration of dissolved hydrogen  $C_{H_2}^0$ , and the difference in diffusion coefficients between the acid and  $H_2$   $\varepsilon_D$ . When homoconjugation is negligible as for the case of trifluoroacetic acid in DMF, the theoretical half-wave potential,  $E_{1/2}^T$ , can be calculated using the following equation:

$$E_{1/2}^T = E_{H^+/H_2}^0 - (2.303 \times RT/F) \times pK_a + \varepsilon_D - (RT/2F) \times \ln(C_0/C_{H_2}^0) \quad (2)$$

The relevant values of  $E_{H^+/H_2}^0$  (-0.62 V),  $pK_a$  ( $6.00 \pm 0.3$ ),  $\varepsilon_D$  ( $0.04 \pm 0.005$  V) and  $C_{H_2}^0$  ( $1.9 \cdot 10^{-3}$  M), were obtained from the references listed below. We used  $R = 8.31 \text{ J.K}^{-1}.\text{mol}^{-1}$ ,  $T = 298 \text{ K}$ ,  $F = 96500 \text{ C.mol}^{-1}$ ,  $C_0 = 0.1 \text{ M}$  and  $E_{1/2}^{cat} = -1.55 \text{ V}$  versus  $\text{Fc}^{+/0}$ .

## 8. Kinetic analysis

The Turnover frequency (TOF) value of **Ni<sub>3</sub>L<sub>2</sub>** was evaluated using the peak current of the catalyst in the absence  $i_p$  and presence of proton source  $i_{cat}$ . Without substrate, the peak current is given by the Randles-Sevcik equation (3).

$$i_p = (0.4463 \times n_p F A [Cat]) \times \sqrt{F v D / RT} \quad (3)$$

In (3),  $n_p$  is the number of electrons transferred ( $n_p = 1$ ),  $F$  is Faraday's constant,  $A$  is the active surface area of the working electrode,  $[Cat]$  is the concentration of the catalyst,  $v$  is the scan rate,  $D$  is the diffusion coefficient,  $R$  is the universal gas constant and  $T$  is temperature.

In the presence of substrate, the peak current is given by equation (4):

$$i_{cat} = (n_{cat} F A [Cat]) \times \sqrt{D k_{H_2} [H^+]} \quad (4)$$

In (4),  $n_{cat}$  is the number of electrons required for the catalytic reaction ( $n_{cat} = 2$ ),  $k_{H_2}$  is the rate constant of the catalytic reaction and  $[H^+]$  is the acid concentration.

Thus, the ratio of  $i_{cat}/i_p$  is given by equation (5):

$$i_{cat}/i_p = \left(n_{cat}/0.4463n_p\right) \times \sqrt{RT/F} \times \sqrt{k_{H_2}[H^+]/v} \quad (5)$$

Under pseudo first-order conditions where  $k_{obs} = k_{H_2} \times [H^+]$ , we obtain equation (6):

$$i_{cat}/i_p = 4.484 \times \sqrt{RT/F} \times v \quad (6)$$

When at scan rate independent conditions, we can derive equation (7) to estimate the observed rate constant or the maximum TOF value:

$$TOF_{max} = k_{obs} = 1.938 \times v \left[i_{cat}/i_p\right]^2 \quad (7)$$

The above equations are used to estimate TOF values in the case of electrocatalysts under pure kinetic conditions where plateau current is easily observable and is scan rate independent. In the case of **Ni<sub>3</sub>L<sub>2</sub>**, the peak current  $i_{cat}$  plateaus for concentration and scan rates higher than 100 mM and 2 V.s<sup>-1</sup>, respectively. In addition, the ratio  $(i_{cat}/i_p)$  varies linearly with the inverse of the square root of scan rate  $\sqrt{v}$  which confirms the validity of the approach.

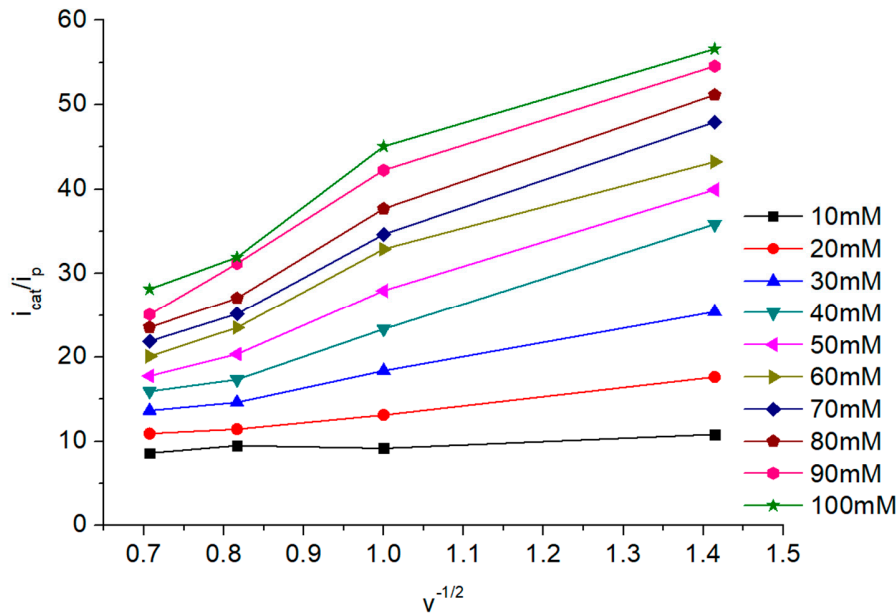

**Figure S23.** Plot of  $i_{cat}/i_p$  versus inverse of the square root of the scan rate ( $v^{-1/2}$ ) for **Ni<sub>3</sub>L<sub>2</sub>** in DMF in the presence of different amounts of TFA. The plots were derived from the voltammograms recorded at different scan rates in the absence and presence of proton source.

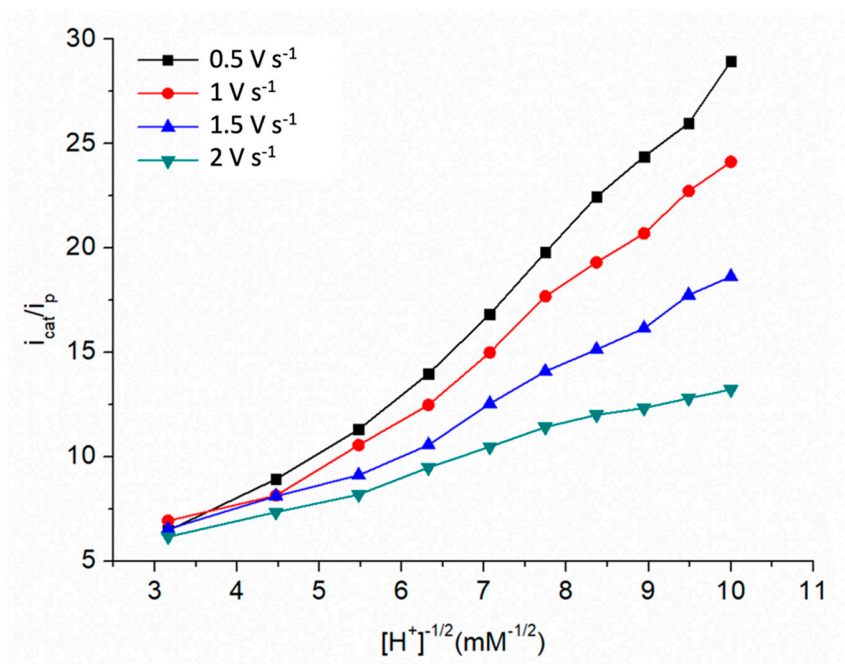

**Figure S24.** Plot of  $i_{cat}/i_p$  versus the square root of the acid concentration ( $[H^+]^{-1/2}$ ) for  $Ni_3L_2$  in DMF at different scan rates. The plots were derived from the voltammograms recorded at different scan rates in the absence and presence of proton source.

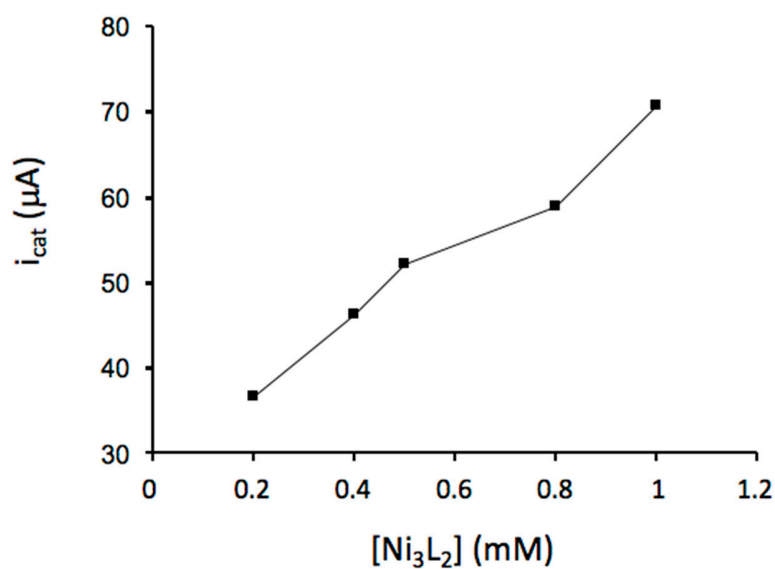

**Figure S25.** Plot of  $i_{cat}$  versus the  $Ni_3L_2$  concentration in DMF in the presence of 100 mM TFA at  $500 mV s^{-1}$ .

## 9. DFT calculations

**Table S5.** Top: Comparison of free energies for each oxidation state of **Ni<sub>3</sub>L<sub>2</sub>** for up to three reduction events. Bottom: Comparison of free energies for the neutral state of **Ni<sub>3</sub>L<sub>2</sub>** including 2 bound DMSO molecules.

| Oxidation state                                      | Gibbs free energy (Eh) | Relative free energy<br>(kcal/mol) |
|------------------------------------------------------|------------------------|------------------------------------|
| <b>Ni<sub>3</sub>L<sub>2</sub> (no DMSO)</b>         |                        |                                    |
| <b>Q = 0, S = 0</b>                                  | -9986.413809           | 0                                  |
| Q = 0, S = 1                                         | -9986.410978           | 1.8                                |
| <b>Q = (-1), S = 1/2</b>                             | -9986.553718           | -                                  |
| Q = (-2), S = 0                                      | -9986.649992           | 10.4                               |
| <b>Q = (-2), S = 1</b>                               | -9986.666662           | 0                                  |
| Q = (-2), Ms = 0                                     | -9986.665499           | 0.7                                |
| <b>Q = (-3), S = 1/2</b>                             | -9986.766808           | 0                                  |
| Q = (-3), S = 3/2                                    | -9986.766474           | 0.2                                |
| Q = (-3), Ms = 1/2                                   | -9986.766344           | 0.3                                |
| <b>Ni<sub>3</sub>L<sub>2</sub> (2 DMSO included)</b> |                        |                                    |
| <b>Q = 0, S = 0</b>                                  | -11092.960417          | 0                                  |
| Q = 0, S = 1                                         | -11092.954677          | 3.6                                |

**Table S6.** Redox potentials of  $\text{Ni}_3\text{L}_2$ , considering three successive one-electron as well as two-electron reduction events for the deprotonated complex, and redox processes including protonation of the complex. We are considering  $\text{Ni}_c$  as our protonation site (see Mechanistic considerations section in the main text). All results are reported vs.  $\text{Fc}^{+/0}$  electrode, where the reference was calculated to be -4.87 V using the same level of theory (BP86/def2-TZVP(-f), CPCM(DMF)).

| Process             | Oxidation state                                                               | $E^0(\text{V})$ |
|---------------------|-------------------------------------------------------------------------------|-----------------|
| 1-electron          | $Q = 0, S = 0 \rightarrow Q = (-1), S = \frac{1}{2}$                          | -1.06           |
| 1-electron          | $Q = (-1), S = \frac{1}{2} \rightarrow Q = (-2), S = 1$                       | -1.83           |
| 1-electron          | $Q = (-2), S = 1 \rightarrow Q = (-3), S = \frac{1}{2}$                       | -2.11           |
| 2-electron          | $Q = 0, S = 0 \rightarrow Q = (-2), S = 1$                                    | -1.45           |
| 2-electron          | $Q = (-1), S = \frac{1}{2} \rightarrow Q = (-3), S = \frac{1}{2}$             | -1.97           |
| 1-electron 1-proton | $Q = 0, S = \frac{1}{2} \rightarrow Q = (-1), S = 1 (\text{Ni}_c\text{H})$    | -1.19           |
| 1-electron 1-proton | $Q = (-1), S = 1 \rightarrow Q = (-2), S = \frac{1}{2} (\text{Ni}_c\text{H})$ | -1.47           |

**Table S7.** Mulliken spin densities of the Ni centers (central, c and side, s and s') in the one-, two-, and three-electron reduced complex  $\text{Ni}_3\text{L}_2$ .

| Charge – spin state         | Atom           | Spin density |
|-----------------------------|----------------|--------------|
| $Q = (-1), S = \frac{1}{2}$ | $\text{Ni}_c$  | 0.843        |
|                             | $\text{Ni}_s$  | 0.002        |
|                             | $\text{Ni}_s'$ | 0.002        |
| $Q = (-2), S = 1$           | $\text{Ni}_c$  | 0.837        |
|                             | $\text{Ni}_s$  | 0.753        |
|                             | $\text{Ni}_s'$ | 0            |
| $Q = (-3), S = \frac{1}{2}$ | $\text{Ni}_c$  | 0.848        |
|                             | $\text{Ni}_s$  | 0.786        |
|                             | $\text{Ni}_s'$ | 0.785        |



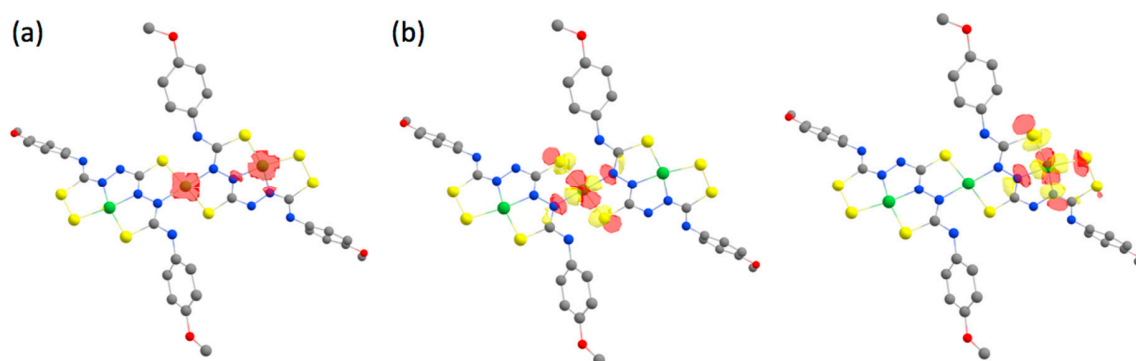

**Supplementary figure S26.** Spin density plot (a) and localized Singly Occupied Molecular Orbital (SOMO, b) for **Ni<sub>3</sub>L<sub>2</sub>** after two subsequent one-electron reduction reactions. The complex is in a triplet dianionic state.

**Table S8.** Relative  $pK_a$  values for **Ni<sub>3</sub>L<sub>2</sub>** before reduction steps. Values are relative to the free energy of protonating the Ni<sub>c</sub> atom. 'X' corresponds to cases where geometry optimization of the protonated complex showed cleavage of the complex. Cleavage cases are not considered, as they will affect the ability to restore the catalyst at the end of the catalytic cycle.

| Proton site     | Ni <sub>3</sub> L <sub>2</sub> <sup>+</sup> |
|-----------------|---------------------------------------------|
| Ni <sub>c</sub> | 0.0                                         |
| Ni <sub>s</sub> | [a]                                         |
| S <sub>c</sub>  | 8.2                                         |
| S <sub>sc</sub> | 4.4                                         |
| S <sub>s</sub>  | 9.7                                         |
| S <sub>d</sub>  | -1.9                                        |
| N <sub>c</sub>  | 2.8                                         |
| N <sub>sc</sub> | 1.3                                         |
| N <sub>s</sub>  | 5.0                                         |

[a] Attempting to protonate Ni<sub>s</sub> leads to a proton transfer to S<sub>s</sub>

Prior to reduction, S<sub>s</sub> is the first protonation site. Nevertheless, this preference changes to Ni<sub>c</sub> being the first protonation site upon the first reduction. For the unreduced case, we started by putting TFAH in H-bonding position with S<sub>s</sub>, our best candidate in terms of  $pK_a$ s, and S<sub>c</sub>, the second best. Geometry optimization of the system in the product state, i.e. with the proton attached to the complex, resulted in the proton moving back to form TFAH. This suggests that a proton transfer between TFAH and **Ni<sub>3</sub>L<sub>2</sub>** in its neutral state would yield a high-energy intermediate, thus being unlikely to occur.

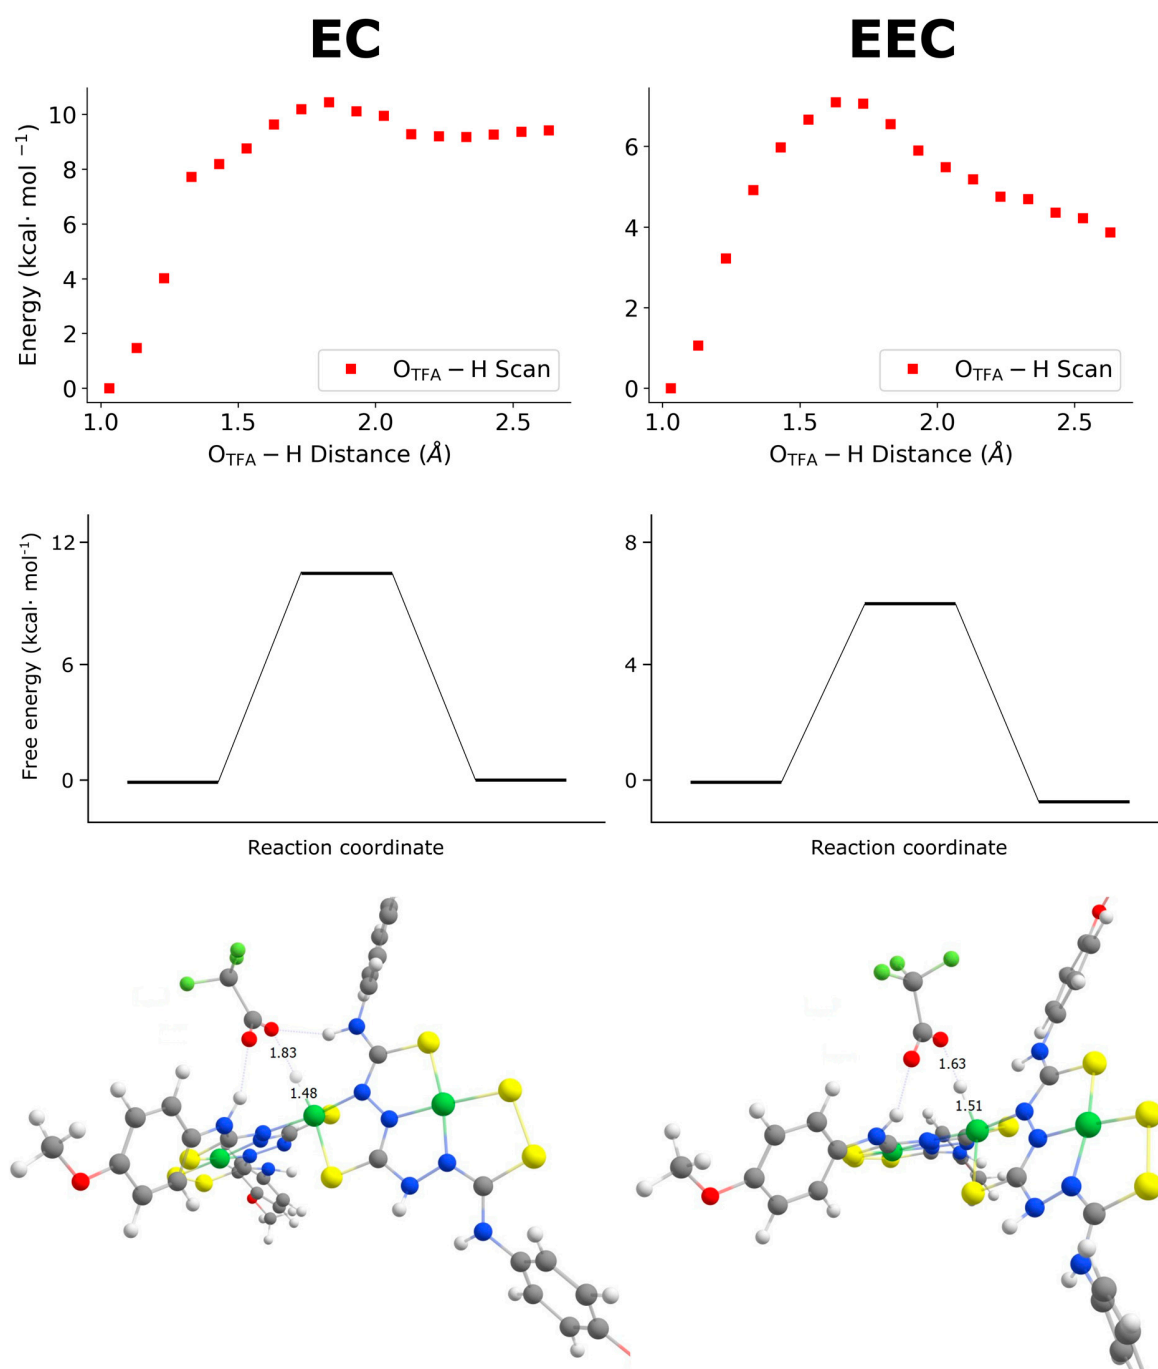

**Figure S27.** Potential energy surface scans for the proton transfer between TFAH and **Ni<sub>3</sub>L<sub>2</sub>** after the first (left) and second (right) reductions (top), free energy diagrams of the proton transfer, where the transition state was taken as the highest point in the PES scan (middle) and transition state geometries, with Ni-H and O<sub>TFA</sub>-H distances displayed in Å (bottom). Their cartesian coordinates are provided in Tables S14 and S15.

**Table S9.** Cartesian coordinates of  $\text{Ni}_3\text{L}_2$  used as the reference for the study including 2 DMSO.

|    |                   |                   |                   |
|----|-------------------|-------------------|-------------------|
| Ni | 24.71490184937175 | 24.85884870163864 | -4.20768747495596 |
| Ni | 23.24819073957001 | 26.06593765098960 | 0.18492882280339  |
| S  | 21.67870765797588 | 24.75359056101595 | -0.51663099686504 |
| S  | 22.49593852411109 | 26.37919101826877 | 2.19197878913501  |
| S  | 26.13171120582073 | 26.40967323950533 | -3.10868155574816 |
| S  | 23.76480228916352 | 27.95558556357658 | 2.84171884986062  |
| S  | 24.14460537385856 | 22.20352084133381 | -6.11745454896985 |
| N  | 23.55780973913461 | 24.96407384522050 | -2.45513868860566 |
| O  | 23.49644470930579 | 23.20013117324775 | -5.12031951154328 |
| N  | 24.06608977273711 | 25.78747284986621 | -1.45540068204475 |
| N  | 24.67111796564826 | 27.23215873669706 | 0.46802730517512  |
| C  | 25.17325203478966 | 26.48556835310603 | -1.68639936997785 |
| N  | 25.51266522873205 | 27.37062325470522 | -0.66240142212206 |
| H  | 26.51297345174814 | 27.39841851572551 | -0.43871092297953 |
| N  | 21.79811379630602 | 23.53603033332017 | -2.94123268254470 |
| H  | 22.34655573785427 | 23.25483868134226 | -3.77056552292819 |
| O  | 27.26314061791858 | 32.43489810117588 | 5.64633173474919  |
| C  | 20.49321676786332 | 22.99353091094821 | -2.80067180161566 |
| C  | 22.40264875040073 | 24.41173068642158 | -2.09545133667961 |
| C  | 24.85640768894903 | 28.07093873050741 | 1.47664651794374  |
| N  | 25.82869814895759 | 29.03142442813951 | 1.43792008410985  |
| H  | 26.04301252229300 | 29.37448583206255 | 0.49901933743233  |
| C  | 26.62030503356213 | 32.16196303027934 | 3.29332842324703  |
| H  | 26.67774429191760 | 33.22780574819122 | 3.07954745565034  |
| C  | 26.90154114614416 | 31.66296481747892 | 4.57447705876885  |
| C  | 23.54531549949663 | 22.68299400601144 | -7.75945405751576 |
| H  | 22.45101464434128 | 22.75277529409726 | -7.73970248754515 |
| H  | 23.88727245600113 | 21.92079771652941 | -8.47177074016547 |
| H  | 24.00403721557764 | 23.65079711364448 | -7.99534670538578 |
| C  | 23.19024464600200 | 20.67349601845576 | -5.94329484914183 |
| H  | 23.40064666001929 | 20.26756762694045 | -4.94724357252495 |
| H  | 23.54292080665786 | 19.97456902371204 | -6.71251222492853 |
| H  | 22.12314193730061 | 20.89445772057566 | -6.06653346195741 |
| O  | 16.62674631711296 | 21.41290801272485 | -2.54585551474976 |
| C  | 26.16391634746009 | 29.90596331491010 | 2.50836174856483  |
| C  | 17.91750494563320 | 21.86319266544967 | -2.64336786837440 |
| C  | 20.30872014905234 | 21.61207635114023 | -2.93209109739312 |
| H  | 21.17550862299203 | 20.96565622618540 | -3.07858997402653 |
| C  | 26.82734904495018 | 30.27848036388917 | 4.80948264154623  |
| H  | 27.07039213327503 | 29.89504481595077 | 5.80143062040570  |
| C  | 26.24482895858308 | 31.28291269419043 | 2.27324799522495  |
| H  | 26.01113038854085 | 31.67706593807321 | 1.28246420048964  |
| C  | 19.03247337611440 | 21.04207579920137 | -2.86571088672389 |
| H  | 18.92529058240497 | 19.96409326960273 | -2.97428110226028 |
| C  | 26.47792517952350 | 29.40639408259640 | 3.78405341202751  |
| H  | 26.46607008580941 | 28.33214531032715 | 3.96943957549650  |
| C  | 18.09596071560052 | 23.25248028535194 | -2.51208517655080 |
| H  | 17.22138511376695 | 23.88646014228532 | -2.35783638999030 |
| C  | 19.36560768947851 | 23.81149125815899 | -2.60295906589126 |
| H  | 19.48581749838571 | 24.89234563126018 | -2.53115871475840 |
| C  | 27.35763273366662 | 33.85622287142805 | 5.43578209239572  |
| H  | 26.38696616769196 | 34.27555006240620 | 5.13043498886643  |

|    |                   |                   |                    |
|----|-------------------|-------------------|--------------------|
| H  | 28.11976418221576 | 34.09339103378763 | 4.67793174259508   |
| H  | 27.65445453160032 | 34.27702831830938 | 6.40204179080760   |
| C  | 16.40952377141574 | 19.99623386866129 | -2.67930050872209  |
| H  | 16.73576003237233 | 19.63727288743717 | -3.66738299466048  |
| H  | 15.32914998165296 | 19.85312482499783 | -2.57285614447026  |
| H  | 16.93707427251607 | 19.43961232128895 | -1.88975298681841  |
| Ni | 26.18074864730576 | 26.06693323912438 | -8.60010603525622  |
| S  | 27.74977898832554 | 24.75290699612223 | -7.90083776026362  |
| S  | 26.92845321884239 | 26.37650048193859 | -10.60939336903393 |
| S  | 23.30866133686920 | 26.42353265634711 | -5.29804126427633  |
| S  | 25.66107141297449 | 27.95443024629849 | -11.25768226661106 |
| S  | 25.28472619996971 | 22.20029573455308 | -2.29421199904149  |
| N  | 25.87392484548478 | 24.96579429804283 | -5.95935836004939  |
| O  | 25.91901231202277 | 23.18362492202414 | -3.31276096727988  |
| N  | 25.36564206271922 | 25.79048015177015 | -6.95806410908223  |
| N  | 24.75948774365337 | 27.23593584472981 | -8.88076508617310  |
| C  | 24.26184382617299 | 26.49281671482828 | -6.72415578470380  |
| N  | 23.92170778295111 | 27.37764330469097 | -7.74812996279901  |
| H  | 22.92066444763807 | 27.40720083823027 | -7.96822307674411  |
| N  | 27.63197906165799 | 23.53411636308392 | -5.47680246847508  |
| H  | 27.08225494345885 | 23.24891568467554 | -4.64979731281983  |
| O  | 22.15017420444171 | 32.42969438866240 | -14.06001271019738 |
| C  | 28.93568158901106 | 22.98961401680870 | -5.61890670905437  |
| C  | 27.02764976545730 | 24.41163995483067 | -6.32102755395121  |
| C  | 24.57268796548271 | 28.07318547933179 | -9.89036391576363  |
| N  | 23.60216727275714 | 29.03550616830747 | -9.85009285615579  |
| H  | 23.39280369193241 | 29.38174123250055 | -8.91124121798068  |
| C  | 22.80065544179974 | 32.16144666677200 | -11.70857353972218 |
| H  | 22.74248204529360 | 33.22755483650820 | -11.49638048620172 |
| C  | 22.51594881275257 | 31.65995824245501 | -12.98795190710737 |
| C  | 25.91461283377090 | 22.69179125494122 | -0.66725738526946  |
| H  | 27.00843108986524 | 22.75990328012432 | -0.70774246068078  |
| H  | 25.58476163366300 | 21.93583900350891 | 0.05729659421275   |
| H  | 25.46099474581112 | 23.66178537782649 | -0.43080423044432  |
| C  | 26.22883046403194 | 20.66444227363332 | -2.47132101504883  |
| H  | 26.00080345739053 | 20.25232927227815 | -3.46093681951572  |
| H  | 25.88500602702853 | 19.97311822049103 | -1.69129613521643  |
| H  | 27.29876253490721 | 20.88110411741611 | -2.36653072492219  |
| O  | 32.79924782647863 | 21.40225365038082 | -5.87816926592740  |
| C  | 23.26259632602939 | 29.90736785503814 | -10.92118838171008 |
| C  | 31.50936322723069 | 21.85485918006198 | -5.77888330205952  |
| C  | 29.11835778803871 | 21.60817505696046 | -5.48436493801857  |
| H  | 28.25088842081427 | 20.96347878815068 | -5.33431261725244  |
| C  | 22.59112517832057 | 30.27515555813998 | -13.22077554095205 |
| H  | 22.34539032045488 | 29.88969524865344 | -14.21127567870794 |
| C  | 23.18058239513647 | 31.28462837342224 | -10.68823183541751 |
| H  | 23.41700351482646 | 31.68082297478406 | -9.69890148831339  |
| C  | 30.39359831961793 | 21.03609751833799 | -5.55202182196741  |
| H  | 30.49935832055823 | 19.95824368697360 | -5.44091047241306  |
| C  | 22.94504767757294 | 29.40524410670339 | -12.19502897822548 |
| H  | 22.95771862837304 | 28.33071983472194 | -12.37872052332832 |
| C  | 31.33276144604788 | 23.24408498823697 | -5.91315966549282  |
| H  | 32.20797032482261 | 23.87634830644220 | -6.07083704538524  |
| C  | 30.06418921896179 | 23.80533193248050 | -5.82090417574663  |

|   |                   |                   |                    |
|---|-------------------|-------------------|--------------------|
| H | 29.94562690345168 | 24.88619930042387 | -5.89506816552492  |
| C | 22.05479477121483 | 33.85125287362377 | -13.85149384406259 |
| H | 23.02602699754401 | 34.27222417183208 | -13.55021450820776 |
| H | 21.29503672031934 | 34.08883159644125 | -13.09139108463715 |
| H | 21.75412630180149 | 34.27013397922092 | -14.81740552959846 |
| C | 33.01441229004392 | 19.98551648762350 | -5.74221199340899  |
| H | 32.68966406438908 | 19.62913353671766 | -4.75270067678358  |
| H | 34.09433071893552 | 19.84040268660390 | -5.85059498857089  |
| H | 32.48431749322700 | 19.42810307082404 | -6.52949818181980  |

**Table S10.** Cartesian coordinates of  $\text{Ni}_3\text{L}_2$  in its neutral form ( $Q = 0$ ,  $S = 0$ ).

|    |                   |                   |                    |
|----|-------------------|-------------------|--------------------|
| Ni | 24.68703987323967 | 26.18011852907187 | -4.19880923676987  |
| Ni | 23.18655037526463 | 26.35128226791460 | 0.16870177775400   |
| S  | 21.55869126964408 | 25.44015523588120 | -0.93480307812059  |
| S  | 22.31151783667053 | 26.29969583436859 | 2.14653977461572   |
| S  | 26.34306082691130 | 26.70324180133583 | -2.805225254449846 |
| S  | 23.81812692716051 | 27.29868949145121 | 3.26456270181850   |
| N  | 23.55465873599899 | 25.98304927588155 | -2.66636771647811  |
| N  | 24.06558326819511 | 26.41643549289664 | -1.44537655851981  |
| N  | 24.78903207776548 | 27.05134733570931 | 0.82349307729534   |
| C  | 25.32769554599680 | 26.78948247715828 | -1.41012721572069  |
| N  | 25.76198968300947 | 27.27348736040724 | -0.18808771439427  |
| H  | 26.71576549203155 | 27.00642222694134 | 0.07715402857241   |
| N  | 21.77528830975878 | 24.77641135864670 | -3.55508858074739  |
| H  | 22.39055212988690 | 24.60672063194523 | -4.35334254741589  |
| O  | 27.81763862711571 | 29.90971731859171 | 7.39289034943464   |
| C  | 20.44136566772480 | 24.30463308618535 | -3.66949168040876  |
| C  | 22.34695059172887 | 25.41886028695587 | -2.50667788276700  |
| C  | 25.03859399918724 | 27.53663579458038 | 2.03309741510313   |
| N  | 26.18391955267527 | 28.22272526837587 | 2.31099476737672   |
| H  | 26.57341897013661 | 28.74222240287673 | 1.52166023856206   |
| C  | 27.36428472610335 | 30.46049173362750 | 5.04519878922519   |
| H  | 27.63751234429306 | 31.50756214393727 | 5.16350132019258   |
| C  | 27.42449916418324 | 29.56844303990324 | 6.12722264346509   |
| O  | 16.52147973919831 | 22.93556574756451 | -4.14063630843393  |
| C  | 26.57633732592392 | 28.66766130466229 | 3.60558986806928   |
| C  | 17.82892762702638 | 23.32496718621795 | -4.02194550116658  |
| C  | 20.22348006070188 | 23.05836815689221 | -4.26874921071815  |
| H  | 21.07702211221094 | 22.46077192984977 | -4.59371775446059  |
| C  | 27.07391154558963 | 28.22016712343208 | 5.93394050446608   |
| H  | 27.14545818158116 | 27.52771947273223 | 6.77377577391132   |
| C  | 26.93242888581553 | 30.00691113023602 | 3.79556060540072   |
| H  | 26.87175171529577 | 30.70669534453318 | 2.96014223519037   |
| C  | 18.92778954131871 | 22.56777662435423 | -4.45533597249646  |
| H  | 18.79127535677754 | 21.59603037659884 | -4.92674926362762  |
| C  | 26.66873781956478 | 27.76958173683572 | 4.68243698637200   |
| H  | 26.43985556835367 | 26.71379767262513 | 4.53612719396921   |
| C  | 18.04564350655459 | 24.58129636418660 | -3.42760485666183  |
| H  | 17.18552001159741 | 25.17423545899495 | -3.11316954857491  |
| C  | 19.33578827153790 | 25.07302417654051 | -3.26528639292153  |
| H  | 19.48452844007056 | 26.06238128535008 | -2.83390465388482  |
| C  | 28.18598118871922 | 31.28262257894077 | 7.62431008419905   |

|    |                   |                   |                    |
|----|-------------------|-------------------|--------------------|
| H  | 27.33993455345037 | 31.95710305674618 | 7.42331963692604   |
| H  | 29.04709501462409 | 31.57081057034196 | 7.00251143100910   |
| H  | 28.45953479493006 | 31.33849097280902 | 8.68298883744700   |
| C  | 16.26490079885210 | 21.65862762247330 | -4.75443118329783  |
| H  | 16.63727840366321 | 21.63650428094753 | -5.78983486651032  |
| H  | 15.17592708605734 | 21.54467359397297 | -4.75093906346226  |
| H  | 16.72538214114042 | 20.84301672301649 | -4.17650164544927  |
| Ni | 26.18623381185975 | 26.41019392104813 | -8.56430146494189  |
| S  | 27.80810863499056 | 25.46981824302908 | -7.47686798683753  |
| S  | 27.05904468302547 | 26.38226805192117 | -10.54362695834902 |
| S  | 23.03489610459543 | 26.74046970401007 | -5.58246338502905  |
| S  | 25.56002115922343 | 27.41150108420765 | -11.64422096995363 |
| N  | 25.81744010441250 | 25.99991675080521 | -5.73504030818705  |
| N  | 25.30895474187632 | 26.45653371693516 | -6.94854871931211  |
| N  | 24.58890495173040 | 27.13332178788923 | -9.20657729306275  |
| C  | 24.04991242194387 | 26.84038443235596 | -6.97683908444279  |
| N  | 23.61864720056247 | 27.34737717792320 | -8.19066150261552  |
| H  | 22.66250792271791 | 27.09243394320467 | -8.45932583421774  |
| N  | 27.58901082210730 | 24.76694395984792 | -4.86708479214280  |
| H  | 26.97313833023263 | 24.58942376489465 | -4.07101144373761  |
| O  | 21.58066003347964 | 30.11827309498090 | -15.72854890682996 |
| C  | 28.91916160719769 | 24.28259500637398 | -4.76161559481480  |
| C  | 27.02104064779862 | 25.42973983773181 | -5.90477431420949  |
| C  | 24.34237568357878 | 27.63955493022425 | -10.40814568633156 |
| N  | 23.20225635954520 | 28.33898119336504 | -10.67432451632641 |
| H  | 22.81844449479148 | 28.85027399464389 | -9.87686720237110  |
| C  | 22.04107962523982 | 30.62915046353002 | -13.37323359486156 |
| H  | 21.77753638058502 | 31.68039313286002 | -13.47539340763818 |
| C  | 21.97164003620136 | 29.75420154429873 | -14.46857818772623 |
| O  | 32.82815111331406 | 22.87404655431946 | -4.31683453562375  |
| C  | 22.81320222668574 | 28.80741224044306 | -11.96167582763422 |
| C  | 31.52384963124607 | 23.27614954085806 | -4.42761326778526  |
| C  | 29.12750799983837 | 23.02593868616003 | -4.18095531503139  |
| H  | 28.26950566731365 | 22.43075921731069 | -3.86336659421683  |
| C  | 22.30973364018548 | 28.39991149092216 | -14.29608515582225 |
| H  | 22.23108312633885 | 27.72094026390203 | -15.14622264431543 |
| C  | 22.46963007815696 | 30.15268156258653 | -12.13098331099663 |
| H  | 22.53743287725406 | 30.83912751479270 | -11.28511075162076 |
| C  | 30.41932285506207 | 22.52191307177811 | -4.00356878196239  |
| H  | 30.54840549868628 | 21.54228631548072 | -3.54660962457694  |
| C  | 22.71159342214508 | 27.92666219661320 | -13.05190265969070 |
| H  | 22.93078346496893 | 26.86670770387691 | -12.92176853936777 |
| C  | 31.31677009869568 | 24.54282227643500 | -5.00311064832294  |
| H  | 32.18133555502872 | 25.13314144532820 | -5.31019845021814  |
| C  | 30.03053816163651 | 25.04760089927031 | -5.15619109694303  |
| H  | 29.88946287680389 | 26.04433879873806 | -5.57285349718525  |
| C  | 21.22527932687096 | 31.49797378372496 | -15.93888393269857 |
| H  | 22.07777571037293 | 32.16124282913960 | -15.72813013473243 |
| H  | 20.36721312135282 | 31.78484283105653 | -15.31227836018057 |
| H  | 20.95180519998872 | 31.57252937411847 | -16.99643355982261 |
| C  | 33.07488580322246 | 21.58598545429550 | -3.72256141047296  |
| H  | 32.70420436786235 | 21.55161224342629 | -2.68688007812250  |
| H  | 34.16283547077366 | 21.46280010277548 | -3.72981581480326  |
| H  | 32.60639826326238 | 20.78300898106907 | -4.31163820678306  |

**Table S11.** Cartesian coordinates of  $\text{Ni}_3\text{L}_2$  in its monoanionic form ( $Q = (-1)$ ,  $S = 1/2$ ).

|    |                   |                   |                    |
|----|-------------------|-------------------|--------------------|
| Ni | 24.77459216598267 | 27.06943183866915 | -4.27354579545575  |
| Ni | 23.62684402940488 | 26.10942829955895 | 0.17805366504186   |
| S  | 21.96016845231384 | 25.33667932457990 | -0.97880890860590  |
| S  | 22.97189851197035 | 25.45662900724755 | 2.13979141172611   |
| S  | 26.42666923229676 | 27.71099157002383 | -2.78728040295930  |
| S  | 24.42688698483403 | 26.40209767015061 | 3.36755803644928   |
| N  | 23.74164075086195 | 26.46543998351954 | -2.67632192911436  |
| N  | 24.33653676875346 | 26.66072677212547 | -1.43673303323149  |
| N  | 25.17735365690374 | 26.87635392336038 | 0.87846320374740   |
| C  | 25.53049281263028 | 27.23804932893232 | -1.39556161864898  |
| N  | 26.00115430763245 | 27.48312352692250 | -0.10446754339912  |
| H  | 27.00137550858553 | 27.29540173122664 | 0.02088616790239   |
| N  | 21.87667368740592 | 25.61005920520917 | -3.71406614477053  |
| H  | 22.24815494663536 | 26.14641456814269 | -4.51457496146921  |
| O  | 28.48868055996754 | 28.62428840075175 | 7.70546468850945   |
| C  | 20.64542671203558 | 24.95621816582799 | -3.91954816586322  |
| C  | 22.57824791843881 | 25.82669311119282 | -2.56080693471465  |
| C  | 25.47974421504793 | 27.09410884687899 | 2.14956720502617   |
| N  | 26.54774650700976 | 27.86936846728249 | 2.50755176669818   |
| H  | 26.77592923487633 | 28.60674929204878 | 1.83729991492128   |
| C  | 27.74549138939769 | 29.60066463053671 | 5.57947134105615   |
| H  | 27.91567527569696 | 30.62452728464550 | 5.90786785753443   |
| C  | 28.00889909018421 | 28.51386454135551 | 6.42722156698784   |
| O  | 16.97094488814082 | 23.15721511222660 | -4.85063753853732  |
| C  | 27.01259748607974 | 28.07127942391544 | 3.83594802854095   |
| C  | 18.18613901816334 | 23.69356847570187 | -4.50037787758989  |
| C  | 20.24675835297198 | 23.80829865551651 | -3.21939738186606  |
| H  | 20.89697316406718 | 23.37863562163868 | -2.45892438733800  |
| C  | 27.78660342150762 | 27.20507121789315 | 5.96340809040698   |
| H  | 28.01623503166644 | 26.36373621900805 | 6.61881490175596   |
| C  | 27.24092227611009 | 29.37303428360876 | 4.29566233340315   |
| H  | 27.02156531343828 | 30.22220543198015 | 3.64582393325007   |
| C  | 19.02201184176302 | 23.18858361518551 | -3.49524621605156  |
| H  | 18.74417848382160 | 22.30125206565532 | -2.92837992188810  |
| C  | 27.30868526159319 | 26.98401795177856 | 4.67625309626859   |
| H  | 27.18136353837949 | 25.96314516937509 | 4.31563075052285   |
| C  | 18.59424603135449 | 24.82586386095761 | -5.22711454426818  |
| H  | 17.94721746476444 | 25.21472036016679 | -6.01505560776591  |
| C  | 19.80111796672215 | 25.44948871224323 | -4.93562406078902  |
| H  | 20.10088305834677 | 26.33534621604311 | -5.49954704627297  |
| C  | 28.73122469906556 | 29.95162412064775 | 8.20773985755278   |
| H  | 27.80339004070968 | 30.54333468359631 | 8.22342359127303   |
| H  | 29.49176287988266 | 30.46963543421707 | 7.60386844229342   |
| H  | 29.10041702339900 | 29.81618667862724 | 9.22960789547369   |
| C  | 16.53433235301394 | 21.99331311158697 | -4.12741907031564  |
| H  | 17.23288848355795 | 21.15411023322428 | -4.26819526147191  |
| H  | 15.55705139873212 | 21.73362859575547 | -4.54796869020736  |
| H  | 16.42966604121708 | 22.21024502434463 | -3.05307276392813  |
| Ni | 25.71102838109348 | 26.29467744624847 | -8.80414557913448  |
| S  | 27.37928533096557 | 25.38853247520687 | -7.75231037572429  |
| S  | 26.22918677042054 | 25.66140394745436 | -10.81245933425083 |

|   |                   |                   |                    |
|---|-------------------|-------------------|--------------------|
| S | 23.16672821255473 | 27.99728005212224 | -5.66758753182294  |
| S | 24.79920411400931 | 26.75375930743277 | -11.94354678608733 |
| N | 25.75409588605994 | 26.57058258861787 | -5.93843727347497  |
| N | 25.11351163750115 | 26.83922710999820 | -7.14154076711711  |
| N | 24.19317860684031 | 27.19527185182609 | -9.40952963673818  |
| C | 23.96416506984084 | 27.50124996904164 | -7.11146768636391  |
| N | 23.45738140293109 | 27.82348502129153 | -8.37178626086117  |
| H | 22.44215284787751 | 27.70751995324039 | -8.45774934357464  |
| N | 27.55618859819390 | 25.49341313541613 | -5.00864273490294  |
| H | 27.08325670185507 | 25.78420598137542 | -4.13991149380904  |
| O | 20.73932169866519 | 29.41549543574247 | -16.02494179976719 |
| C | 28.81239882682770 | 24.87671520779421 | -4.84563161098846  |
| C | 26.87045450675895 | 25.86688533105054 | -6.12939837510533  |
| C | 23.85318450071665 | 27.47786645847892 | -10.65815039050045 |
| N | 22.83055954614850 | 28.33943166837277 | -10.94303895659709 |
| H | 22.68379066272254 | 29.06602158758007 | -10.23906952416097 |
| C | 21.62916346661713 | 30.26020015984995 | -13.89866876003599 |
| H | 21.51510412520091 | 31.30477010552603 | -14.18329145918314 |
| C | 21.25994251675175 | 29.22586529595311 | -14.77227179339076 |
| O | 32.54171657020980 | 23.07541501324933 | -4.16446486951171  |
| C | 22.32598671510380 | 28.62126652078508 | -12.24199746515813 |
| C | 31.30089316147989 | 23.64381279241253 | -4.32022719958401  |
| C | 29.02964485703996 | 24.16032256812036 | -3.65660674538485  |
| H | 28.21994792077722 | 24.07137325581393 | -2.92955089429365  |
| C | 21.41079849546517 | 27.88879355770709 | -14.36380234505751 |
| H | 21.09903664798428 | 27.08962029252169 | -15.03778030157814 |
| C | 22.16772325393336 | 29.95167045201134 | -12.64592112194324 |
| H | 22.46930447530460 | 30.75959751374203 | -11.97674104287193 |
| C | 30.25913927859980 | 23.55470391200549 | -3.38534793644828  |
| H | 30.38530478411268 | 23.01030955743272 | -2.45083183765228  |
| C | 21.92300936143471 | 27.58843823829509 | -13.10623002320719 |
| H | 21.99420044122438 | 26.54853035450523 | -12.78695766249741 |
| C | 31.09407481233981 | 24.36441065185967 | -5.50799981079426  |
| H | 31.91203747447922 | 24.44900724328681 | -6.22548355986879  |
| C | 29.87390358871782 | 24.98323079951508 | -5.76487711082771  |
| H | 29.75267284729297 | 25.56262880366541 | -6.67868598009797  |
| C | 20.56397879345720 | 30.77372804474033 | -16.46915037821119 |
| H | 21.52709576075868 | 31.30515260246844 | -16.50469519887015 |
| H | 19.86452082051726 | 31.31594357986666 | -15.81483595452447 |
| H | 20.14484351349034 | 30.70106308023379 | -17.47806824946025 |
| C | 32.77982937831628 | 22.34159089680946 | -2.95064892540155  |
| H | 32.67762221503708 | 22.99149641571352 | -2.06783618543155  |
| H | 33.81023680543696 | 21.97774963590697 | -3.02284191383973  |
| H | 32.09101537959901 | 21.48730336262819 | -2.86189775371226  |



**Table S12.** Cartesian coordinates of  $\text{Ni}_3\text{L}_2$  in its dianionic form ( $Q = (-2)$ ,  $S = 1$ ).

|    |                   |                   |                    |
|----|-------------------|-------------------|--------------------|
| Ni | 24.76417642587210 | 27.12481476930367 | -4.29205501010271  |
| Ni | 23.57403615122540 | 26.17516402511446 | 0.20304128476351   |
| S  | 21.92675562067776 | 25.35239950826962 | -1.02832987423509  |
| S  | 22.97784914710880 | 25.56316792294645 | 2.23009182807066   |
| S  | 26.40371879877485 | 27.79007813592962 | -2.79840673757217  |
| S  | 24.50440306346597 | 26.46446325869929 | 3.39766930568159   |
| N  | 23.73207955835466 | 26.52339612708957 | -2.68810632352098  |
| N  | 24.30323639776039 | 26.75097090506526 | -1.44423414288218  |
| N  | 25.16843453445433 | 26.99181850342810 | 0.88623547562208   |
| C  | 25.48856795944761 | 27.33293545456484 | -1.40557432168576  |
| N  | 25.95638365827420 | 27.60914857065902 | -0.11344819879451  |
| H  | 26.96561912472410 | 27.47164874057800 | 0.00370621577343   |
| N  | 21.91711410586454 | 25.63821120591241 | -3.77058115180995  |
| H  | 22.31023141666348 | 26.19373509237907 | -4.54846403279968  |
| O  | 28.78904963048573 | 28.51118172240468 | 7.61497957551980   |
| C  | 20.73693696779821 | 24.93282043446824 | -4.05713771286754  |
| C  | 22.57688247796560 | 25.85796545445965 | -2.58623602226391  |
| C  | 25.52175941729205 | 27.17410070216659 | 2.14137792491023   |
| N  | 26.61767770640211 | 27.93592763680347 | 2.48165306471791   |
| H  | 26.78020097521769 | 28.72572050858532 | 1.85297356339396   |
| C  | 27.95205643436764 | 29.56117019452818 | 5.55821960773240   |
| H  | 28.14076504260478 | 30.57318511158329 | 5.91271544228455   |
| C  | 28.24966119773680 | 28.44626542096568 | 6.35544280890061   |
| O  | 17.22031160118867 | 22.97645880944554 | -5.27342437580933  |
| C  | 27.13294703494242 | 28.09381090724891 | 3.79564373945959   |
| C  | 18.38039357794778 | 23.56699114950336 | -4.82645211349714  |
| C  | 20.29313030645288 | 23.80684685366628 | -3.34550398824417  |
| H  | 20.86585386374091 | 23.44131495669786 | -2.49514787315155  |
| C  | 27.99995844853286 | 27.15491797949997 | 5.85786172364902   |
| H  | 28.25465551164504 | 26.29098253910981 | 6.47366480777021   |
| C  | 27.38734239010669 | 29.37790918791475 | 4.29147708042297   |
| H  | 27.14161703455153 | 30.25006393936513 | 3.68240713190218   |
| C  | 19.12124074486911 | 23.13626131728594 | -3.71810626564302  |
| H  | 18.80878841223750 | 22.26840669115191 | -3.13880071750429  |
| C  | 27.46253729581649 | 26.97891510607551 | 4.58729512154084   |
| H  | 27.31118077722723 | 25.97121998468300 | 4.20003214863064   |
| C  | 18.83171657639047 | 24.67753578050030 | -5.56027133485124  |
| H  | 18.26004245134920 | 25.01109222321183 | -6.42801684043370  |
| C  | 19.98603946434838 | 25.35008899687215 | -5.17789442354673  |
| H  | 20.32038365113855 | 26.21752328023304 | -5.75168247774701  |
| C  | 29.06002292334288 | 29.81964445889396 | 8.14884151326645   |
| H  | 28.13645838573989 | 30.41316298622355 | 8.22891778333617   |
| H  | 29.79277602255978 | 30.35687617371746 | 7.52727809351491   |
| H  | 29.47719131836362 | 29.64982696579949 | 9.14696805257529   |
| C  | 16.74520771219514 | 21.83341756637183 | -4.54325896061876  |
| H  | 17.47737102271878 | 21.01138614003758 | -4.57146759604402  |
| H  | 15.82339066268778 | 21.52246356234454 | -5.04650937899912  |
| H  | 16.52529722978293 | 22.09406593571360 | -3.49615313062623  |
| Ni | 25.74657674007804 | 26.31583442630913 | -8.86655468785558  |
| S  | 27.36677430352867 | 25.32199349078499 | -7.72286130220179  |
| S  | 26.20117441245257 | 25.72737048715168 | -10.93947196924501 |

|   |                   |                   |                    |
|---|-------------------|-------------------|--------------------|
| S | 23.18032003346633 | 28.07574813789673 | -5.70274594638155  |
| S | 24.71799461993881 | 26.80333571710215 | -12.01033838049431 |
| N | 25.73613833953322 | 26.59260133827383 | -5.95825441440727  |
| N | 25.13192734480456 | 26.89894289278701 | -7.16890607985225  |
| N | 24.20382749583354 | 27.29899322096739 | -9.45716406294143  |
| C | 24.00228016335548 | 27.58169896382243 | -7.14308267713526  |
| N | 23.51233015343794 | 27.94440823618834 | -8.40579673500478  |
| H | 22.49112341237170 | 27.89758498031259 | -8.48504350053288  |
| N | 27.45735708295583 | 25.45980896791407 | -4.96640106667577  |
| H | 26.96529185534977 | 25.81782131717810 | -4.13230995083318  |
| O | 20.49441475408591 | 29.41327050039171 | -15.97634015284723 |
| C | 28.67915461287493 | 24.82171531228878 | -4.70199258540530  |
| C | 26.83097282858983 | 25.83983289926239 | -6.12789733866482  |
| C | 23.81946747719157 | 27.55715804727344 | -10.68916443622777 |
| N | 22.78431923178390 | 28.42598916976084 | -10.95796198864909 |
| H | 22.71822853217120 | 29.20136773805236 | -10.29465779178583 |
| C | 21.48474990087745 | 30.29459780437411 | -13.90825755391679 |
| H | 21.36809081584164 | 31.33409211907437 | -14.21035309536396 |
| C | 21.06859005016217 | 29.24609049681099 | -14.74167609158583 |
| O | 32.30385383529585 | 22.94637985494500 | -3.67832119483546  |
| C | 22.23882422044467 | 28.68490092279528 | -12.24310193083745 |
| C | 31.09655394115416 | 23.55241193050438 | -3.94334499287309  |
| C | 28.86770911280876 | 24.32715418814406 | -3.39710510729592  |
| H | 28.06326959625535 | 24.43045990379746 | -2.66579374249479  |
| C | 21.22633399207922 | 27.91707292901847 | -14.31015164825802 |
| H | 20.88000716382299 | 27.10623321972742 | -14.95285685201849 |
| C | 22.07519067211143 | 30.00712718023125 | -12.67297747973218 |
| H | 22.41288325575151 | 30.82722254815715 | -12.03619706528351 |
| C | 30.05816217817904 | 23.70544064880272 | -3.01324445145528  |
| H | 30.15721381914033 | 23.34031179667783 | -1.99204593292028  |
| C | 21.78990041351764 | 27.63885360623655 | -13.06944040017328 |
| H | 21.86910095989531 | 26.60519633138474 | -12.73243028489398 |
| C | 30.92137714722886 | 24.04647929207723 | -5.24535572027783  |
| H | 31.73446234199648 | 23.93962907107349 | -5.96586553951967  |
| C | 29.73816209730019 | 24.67807207208148 | -5.62170381392414  |
| H | 29.63655580092614 | 25.06679454832532 | -6.63303868086475  |
| C | 20.31356918150606 | 30.76295398596632 | -16.44111953705718 |
| H | 21.27936432887551 | 31.28349935133785 | -16.53012915539430 |
| H | 19.64932540061300 | 31.32732867197917 | -15.76875431886930 |
| H | 19.84965917751883 | 30.67463056074764 | -17.42910542455413 |
| C | 32.50098565672117 | 22.43594467905503 | -2.34945556685178  |
| H | 32.44505989686738 | 23.24200547852528 | -1.60115113952586  |
| H | 33.50566843401104 | 21.99971892622562 | -2.34544394463133  |
| H | 31.75953198287865 | 21.65831814073392 | -2.10822055563851  |

**Table S13.** Cartesian coordinates of  $\text{Ni}_3\text{L}_2$  in its dianionic form ( $Q = (-3)$ ,  $S = 1/2$ ).

|    |                   |                   |                   |
|----|-------------------|-------------------|-------------------|
| Ni | 24.61047796692693 | 27.13542616141584 | -4.27206955650259 |
| Ni | 23.43153672311021 | 26.17933831103739 | 0.30568559058823  |
| S  | 21.86590204418020 | 25.20087520642356 | -1.01502495251065 |
| S  | 22.98381909164061 | 25.62294958370009 | 2.40813186339795  |
| S  | 26.19496368591949 | 27.96185034120612 | -2.78294471500989 |
| S  | 24.52927440914396 | 26.61549855127625 | 3.48221682687486  |

|    |                   |                   |                    |
|----|-------------------|-------------------|--------------------|
| N  | 23.61169319556101 | 26.52224126584214 | -2.64417145010039  |
| N  | 24.15256612998686 | 26.81724471811681 | -1.40061215726777  |
| N  | 25.05108165709716 | 27.17331791518271 | 0.93642836365955   |
| C  | 25.29559006916111 | 27.46575787307864 | -1.37943458088585  |
| N  | 25.76110030170091 | 27.80925320269781 | -0.09832992267398  |
| H  | 26.78172632663070 | 27.77690340718278 | -0.00359796544446  |
| N  | 21.88130712692008 | 25.52858928550901 | -3.75559990731585  |
| H  | 22.26846528447888 | 26.11113401288933 | -4.51746099201156  |
| O  | 29.15013373560504 | 28.64608133038265 | 7.40446539168073   |
| C  | 20.81720796114953 | 24.69399186396228 | -4.11819231989092  |
| C  | 22.50381501600212 | 25.77041818004403 | -2.54823719430325  |
| C  | 25.46554377387136 | 27.35755888176860 | 2.16473153625843   |
| N  | 26.55645924148186 | 28.16284946455391 | 2.45747240549286   |
| H  | 26.61008770269889 | 28.99914660288840 | 1.87129762807741   |
| C  | 28.13695518926912 | 29.73176173905423 | 5.44523962806341   |
| H  | 28.35470880470423 | 30.73791837656776 | 5.80009865860796   |
| C  | 28.50301228816786 | 28.60404812636931 | 6.19306288833367   |
| O  | 17.64226024302106 | 22.35620860529525 | -5.60060649891012  |
| C  | 27.16989427583439 | 28.29513942669064 | 3.72774660998227   |
| C  | 18.68938636498590 | 23.07500818971421 | -5.06348721155562  |
| C  | 20.40458588663838 | 23.55457069568537 | -3.40599762009519  |
| H  | 20.91015056526551 | 23.28559621222735 | -2.48062406259768  |
| C  | 28.21129328426138 | 27.32209975556674 | 5.69416033830384   |
| H  | 28.51727145024414 | 26.44719538103938 | 6.27012134266064   |
| C  | 27.46550087317664 | 29.56985375567918 | 4.22778128912401   |
| H  | 27.16905121494633 | 30.45345700627857 | 3.65861712558962   |
| C  | 19.34806633914455 | 22.75864402321204 | -3.86874251162801  |
| H  | 19.05890559492143 | 21.88526661434150 | -3.28521413953949  |
| C  | 27.56690177860497 | 27.16766137278240 | 4.47136026246412   |
| H  | 27.38092695133705 | 26.16660707382802 | 4.08237460113458   |
| C  | 19.10675568274010 | 24.20104728448596 | -5.79349949713625  |
| H  | 18.59960839373789 | 24.44920608341411 | -6.72767259534393  |
| C  | 20.14680941083700 | 24.99545276936326 | -5.32661943683845  |
| H  | 20.45677883749183 | 25.87153153332986 | -5.90161366688152  |
| C  | 29.47429867378932 | 29.94446861652510 | 7.93075995741321   |
| H  | 28.56506300630480 | 30.54024753127001 | 8.10531783411837   |
| H  | 30.14862295976453 | 30.49008556756628 | 7.25264282519351   |
| H  | 29.98130106353526 | 29.75865291956153 | 8.88357461149266   |
| C  | 17.21032680857874 | 21.19447340234486 | -4.87515021564096  |
| H  | 18.02074191204813 | 20.45338191466714 | -4.79070103330386  |
| H  | 16.38418514531090 | 20.77091231133937 | -5.45661030006188  |
| H  | 16.85352416712248 | 21.46323587110356 | -3.86827794358457  |
| Ni | 25.84978816557652 | 26.44124056117087 | -8.88143043852021  |
| S  | 27.40052786093106 | 25.39215587011814 | -7.59833453896191  |
| S  | 26.35658739620895 | 26.04868272876103 | -11.00677493554715 |
| S  | 23.02590727531140 | 28.01195223813810 | -5.73256294888363  |
| S  | 24.82785382857791 | 27.10868245293385 | -12.04318773497987 |
| N  | 25.62431847683698 | 26.60793698805156 | -5.92073191848545  |
| N  | 25.09912461733257 | 26.97290948541436 | -7.15202005111000  |
| N  | 24.22940682002533 | 27.45436058269272 | -9.47667960679015  |
| C  | 23.94982367407614 | 27.61018829369620 | -7.15082565928275  |
| N  | 23.49818704241093 | 28.02648059487640 | -8.41601448344624  |
| H  | 22.47951008668772 | 27.97781397379084 | -8.52453404082396  |
| N  | 27.34414714366167 | 25.55871891828432 | -4.84465046936813  |

|   |                   |                   |                    |
|---|-------------------|-------------------|--------------------|
| H | 26.95799435151006 | 26.10893272978376 | -4.05850554703884  |
| O | 20.53766746798611 | 29.77010711213841 | -15.95043639860981 |
| C | 28.40517784571788 | 24.70480308654126 | -4.52008555466451  |
| C | 26.73681770985317 | 25.86760992205249 | -6.04426187772328  |
| C | 23.86159084374006 | 27.75443383236889 | -10.69770164464182 |
| N | 22.79565813709880 | 28.60231099256358 | -10.95314199831426 |
| H | 22.70815224899271 | 29.35406611106839 | -10.26509576761397 |
| C | 21.43761794910476 | 30.57340914343729 | -13.80852855046955 |
| H | 21.26162528282275 | 31.62153969829810 | -14.04529447401521 |
| C | 21.10131216677726 | 29.55863836727115 | -14.71546552026123 |
| O | 31.53097136284635 | 22.14833667942542 | -3.32314806211774  |
| C | 22.26485149906474 | 28.90761136683069 | -12.23096483866792 |
| C | 30.51577482413856 | 23.02193575309882 | -3.65168575976804  |
| C | 29.08515263066087 | 24.94694680901778 | -3.31057059100515  |
| H | 28.79133626865747 | 25.80337815109521 | -2.69878475342534  |
| C | 21.33506014710936 | 28.21692038094125 | -14.36567996515075 |
| H | 21.05115891449968 | 27.42943470957552 | -15.06572594436663 |
| C | 22.02515744188530 | 30.24241065272482 | -12.58213800658639 |
| H | 22.30064078703669 | 31.03952486490375 | -11.88837092633097 |
| C | 30.12290698249705 | 24.11940382655127 | -2.87268221588931  |
| H | 30.61794251061425 | 24.34745247620535 | -1.92973901097356  |
| C | 21.89505624282677 | 27.89332167063403 | -13.13422367884759 |
| H | 22.03508495844275 | 26.84664045726631 | -12.86411071433724 |
| C | 29.84038557333234 | 22.76566566046316 | -4.85552224228177  |
| H | 30.13591511839885 | 21.90155304550345 | -5.45389889055644  |
| C | 28.79778502740611 | 23.58451464250385 | -5.28353036465837  |
| H | 28.28174922994029 | 23.35862774197597 | -6.21470102909774  |
| C | 20.28370175622469 | 31.13344680587544 | -16.33120301524409 |
| H | 21.21721724168794 | 31.71611338544581 | -16.36492104137216 |
| H | 19.57413875522103 | 31.61292184611234 | -15.63919386131084 |
| H | 19.84419729902375 | 31.08335297128407 | -17.33305673998024 |
| C | 32.22658501237751 | 22.39225109660996 | -2.09048050592961  |
| H | 32.72258872813157 | 23.37566162756318 | -2.10055440121806  |
| H | 32.98081372159900 | 21.60156650687113 | -2.01310945044561  |
| H | 31.54267196608533 | 22.33574386960822 | -1.22889096236371  |

**Table S14.** Cartesian coordinates of TS for the proton transfer between  $\text{Ni}_3\text{L}_2$  and TFAH after the first reduction ( $Q = (-1)$ ,  $S = 1/2$ ).

|    |                   |                   |                   |
|----|-------------------|-------------------|-------------------|
| Ni | 24.47860279737442 | 25.49469859435335 | -4.15697574664078 |
| Ni | 23.28455052920804 | 26.18126181108256 | 0.28750555045533  |
| S  | 21.75878650243560 | 24.85964424160477 | -0.48455874139151 |
| S  | 22.55212780290958 | 26.33147951473838 | 2.31798135713489  |
| S  | 26.05603045999013 | 26.80885972831520 | -3.03636554199203 |
| S  | 23.82157510245750 | 27.85456326163377 | 3.07984374895359  |
| N  | 23.56568215467486 | 25.31255401023413 | -2.44521488135722 |
| N  | 24.06049609672744 | 26.06936711463702 | -1.38462233895386 |
| N  | 24.70318527036887 | 27.33591950946556 | 0.64473938459162  |
| C  | 25.15858031572565 | 26.78942669118192 | -1.57335032087979 |
| N  | 25.51751187329802 | 27.58392004113431 | -0.48754436290336 |
| H  | 26.52306355637050 | 27.60551346405995 | -0.28843471458345 |
| N  | 21.81431703214580 | 23.88527787621127 | -3.00125477276400 |

|    |                   |                   |                    |
|----|-------------------|-------------------|--------------------|
| H  | 22.28182677526879 | 23.76263616038890 | -3.90994117632746  |
| O  | 27.28975937410144 | 32.20250652848417 | 6.14874857745620   |
| C  | 20.63888803310634 | 23.10867010955542 | -2.76977752243779  |
| C  | 22.44077510327989 | 24.66824603127285 | -2.09584743455648  |
| C  | 24.88773137486935 | 28.10022287607930 | 1.71238566572182   |
| N  | 25.83982162856328 | 29.07887229292371 | 1.73416216039767   |
| H  | 26.04826645711110 | 29.48491541249618 | 0.81953810170315   |
| C  | 26.63727518390674 | 32.08086897985228 | 3.78582066625811   |
| H  | 26.69313273171212 | 33.15825435160319 | 3.64079004154156   |
| C  | 26.92409954101916 | 31.50076316312521 | 5.03116898500426   |
| O  | 17.15812650717764 | 20.84260323459616 | -2.33975980949714  |
| C  | 26.17900153946514 | 29.87981646266170 | 2.85909059783581   |
| C  | 18.32829496711701 | 21.54708289154690 | -2.42977337674865  |
| C  | 20.59385657807427 | 22.11619478200668 | -1.78484112264647  |
| H  | 21.46657763121351 | 21.93488842970685 | -1.15766836455596  |
| C  | 26.85150529134887 | 30.10402780918272 | 5.17660230047105   |
| H  | 27.09890230604560 | 29.65743112603512 | 6.14062384867813   |
| C  | 26.25839184081371 | 31.26919767395732 | 2.71285236069374   |
| H  | 26.02069047753989 | 31.72611826859440 | 1.75042496087029   |
| C  | 19.44312847930301 | 21.34404858062182 | -1.60130016848581  |
| H  | 19.43432814501706 | 20.58058434778526 | -0.82529569855783  |
| C  | 26.49839604905104 | 29.29933337416849 | 4.09855917485267   |
| H  | 26.48936456712226 | 28.21548221906596 | 4.21515857097484   |
| C  | 18.37970347940457 | 22.52754298241265 | -3.43680117809717  |
| H  | 17.51050353498048 | 22.67539996310795 | -4.07927185880501  |
| C  | 19.52261572475165 | 23.30332273570552 | -3.59885056367086  |
| H  | 19.55449703487908 | 24.07067106228418 | -4.37383194687808  |
| C  | 27.38536319722467 | 33.63429047461197 | 6.02872684404848   |
| H  | 26.41374369259876 | 34.07357031221704 | 5.75622883775969   |
| H  | 28.14362289108112 | 33.91816820941592 | 5.28323523322653   |
| H  | 27.68819380114112 | 33.99226517105958 | 7.01815836440178   |
| C  | 17.07420033571798 | 19.82382995024597 | -1.32527556845199  |
| H  | 17.83213958296334 | 19.04258521511072 | -1.48719819541105  |
| H  | 16.07256973936977 | 19.39282711223560 | -1.42434461159376  |
| H  | 17.19499564160828 | 20.25640822141016 | -0.32062679524816  |
| Ni | 26.02206399835821 | 26.12956193425090 | -8.47668967794827  |
| S  | 27.45978483313781 | 24.77314540539380 | -7.57425894311760  |
| S  | 26.91093466025654 | 26.25825696974635 | -10.44518302122467 |
| S  | 22.95112421329133 | 26.76259335405659 | -5.40837433951264  |
| S  | 25.74489346583750 | 27.82002145999156 | -11.29279123005955 |
| N  | 25.53389037209477 | 25.32315480411156 | -5.77957241370470  |
| N  | 25.10086756134826 | 26.03892812991750 | -6.87890480815208  |
| N  | 24.64903958174023 | 27.30231103363269 | -8.94674706390410  |
| C  | 23.98511195554298 | 26.75256746078199 | -6.78409417340022  |
| N  | 23.72455477245650 | 27.54003098798466 | -7.89871993464999  |
| H  | 22.74303500262699 | 27.56567168565647 | -8.19424197865037  |
| N  | 26.98899753369586 | 23.66568007329640 | -5.10230261601085  |
| H  | 26.20860498482318 | 23.18955872928348 | -4.61508217538572  |
| O  | 22.57190293223070 | 32.15174838552309 | -14.67469754941579 |
| C  | 28.25319249502366 | 23.04179054968791 | -5.01397558159451  |
| C  | 26.61294958605925 | 24.59001224027407 | -6.03485586351884  |
| C  | 24.56189334086041 | 28.06801026184896 | -10.02585865022820 |
| N  | 23.61908876939922 | 29.05000089100579 | -10.13250931829301 |
| H  | 23.33665386737378 | 29.46301591867373 | -9.24120220150607  |

|   |                   |                   |                    |
|---|-------------------|-------------------|--------------------|
| C | 23.03586958009013 | 32.04440504510615 | -12.26717529799264 |
| H | 22.98671832940776 | 33.12400918270491 | -12.13696088921817 |
| C | 22.83777616775023 | 31.45589457320050 | -13.52574375046246 |
| O | 32.00598237324424 | 21.22182141814481 | -4.61689305095369  |
| C | 23.38298345384566 | 29.84615665288914 | -11.28745717208330 |
| C | 30.74578272258223 | 21.75572914474613 | -4.72569685492444  |
| C | 28.32378672259368 | 21.68406833439295 | -4.67114341359199  |
| H | 27.40011807970480 | 21.12259777171190 | -4.52092433929101  |
| C | 22.89838928451526 | 30.05664868863513 | -13.65251645679273 |
| H | 22.72002516474423 | 29.60425460537105 | -14.62900132192527 |
| C | 23.31590698009938 | 31.23793960750864 | -11.16035476859751 |
| H | 23.48492456371337 | 31.70092962397147 | -10.18643323261338 |
| C | 29.55667481437863 | 21.04157079573704 | -4.51932421907825  |
| H | 29.57379166886359 | 19.98644132850241 | -4.25094365781727  |
| C | 23.15233687489071 | 29.25776737155406 | -12.54280078681221 |
| H | 23.15348502942601 | 28.17268087787405 | -12.64789546384654 |
| C | 30.68035237513255 | 23.11972813502844 | -5.06036549368369  |
| H | 31.60851279752505 | 23.67655862497418 | -5.19897224355473  |
| C | 29.45195270076311 | 23.75842063561705 | -5.19027342747929  |
| H | 29.42244863280672 | 24.82346698877780 | -5.41949487894684  |
| C | 22.49156379218276 | 33.58605677982996 | -14.57535186773391 |
| H | 23.44663226380835 | 34.01213577323595 | -14.23252789329262 |
| H | 21.68311125148012 | 33.88980829824665 | -13.89312463205995 |
| H | 22.27211493184782 | 33.93872115640635 | -15.58840470547519 |
| C | 32.10233493257048 | 19.82854781657440 | -4.27194315283915  |
| H | 31.65344302258612 | 19.63231883224926 | -3.28603917239212  |
| H | 33.17412834812728 | 19.60610319807040 | -4.23973154073033  |
| H | 31.61551624719316 | 19.19789622159059 | -5.03169792747480  |
| H | 23.82485808917841 | 24.29671498529669 | -4.71773747825414  |
| O | 23.14315397398779 | 22.71288415273238 | -5.33064615271698  |
| C | 23.89339835390567 | 21.79352165818570 | -4.89502309330334  |
| C | 23.47406605749256 | 20.33307051901545 | -5.30637805688026  |
| O | 24.92810780027192 | 21.85324003121841 | -4.19694108722470  |
| F | 24.40703765676665 | 19.78498094080659 | -6.14086286658269  |
| F | 23.38637313626839 | 19.51902829540332 | -4.21503854299060  |
| F | 22.27988516846332 | 20.26692228539235 | -5.94811808970221  |

**Table S15.** Cartesian coordinates of TS for the proton transfer between  $\text{Ni}_3\text{L}_2$  and TFAH after the second reduction ( $Q = (-2)$ ,  $S = 1$ ).

|    |           |           |           |
|----|-----------|-----------|-----------|
| Ni | 24.495371 | 25.923147 | -4.134223 |
| Ni | 23.235009 | 26.176584 | 0.414062  |
| S  | 21.554285 | 25.186395 | -0.633634 |
| S  | 22.587264 | 26.109675 | 2.516710  |
| S  | 26.123336 | 27.020881 | -2.842744 |
| S  | 24.113672 | 27.243335 | 3.450375  |
| N  | 23.471367 | 25.750551 | -2.464075 |
| N  | 24.031753 | 26.261761 | -1.306549 |
| N  | 24.834505 | 27.113086 | 0.904170  |
| C  | 25.199832 | 26.871697 | -1.393162 |
| N  | 25.647306 | 27.449426 | -0.200608 |
| H  | 26.654652 | 27.353442 | -0.035345 |

|    |           |           |            |
|----|-----------|-----------|------------|
| N  | 21.600427 | 24.736576 | -3.334876  |
| H  | 22.082613 | 24.956626 | -4.214173  |
| O  | 28.333956 | 30.241540 | 7.122003   |
| C  | 20.354774 | 24.096435 | -3.477663  |
| C  | 22.258480 | 25.211675 | -2.238615  |
| C  | 25.171077 | 27.597333 | 2.082179   |
| N  | 26.276334 | 28.401235 | 2.246044   |
| H  | 26.469272 | 29.004079 | 1.443135   |
| C  | 27.580309 | 30.739011 | 4.837914   |
| H  | 27.788796 | 31.804114 | 4.924131   |
| C  | 27.826215 | 29.863052 | 5.905467   |
| O  | 16.668166 | 22.263453 | -4.301125  |
| C  | 26.765711 | 28.881985 | 3.489974   |
| C  | 17.876664 | 22.828987 | -3.971277  |
| C  | 19.761730 | 23.279615 | -2.504259  |
| H  | 20.263326 | 23.112488 | -1.553490  |
| C  | 27.554221 | 28.492141 | 5.750688   |
| H  | 27.769079 | 27.812370 | 6.576589   |
| C  | 27.043259 | 30.245235 | 3.644454   |
| H  | 26.837840 | 30.934472 | 2.822997   |
| C  | 18.529146 | 22.659379 | -2.743054  |
| H  | 18.099337 | 22.033777 | -1.962102  |
| C  | 27.044770 | 28.003674 | 4.552268   |
| H  | 26.876425 | 26.933159 | 4.434148   |
| C  | 18.478355 | 23.624653 | -4.961636  |
| H  | 17.975788 | 23.752555 | -5.921688  |
| C  | 19.693952 | 24.250234 | -4.714803  |
| H  | 20.145216 | 24.874499 | -5.489347  |
| C  | 28.627485 | 31.638003 | 7.307743   |
| H  | 27.718908 | 32.250572 | 7.203011   |
| H  | 29.389805 | 31.980678 | 6.591399   |
| H  | 29.014946 | 31.724417 | 8.328280   |
| C  | 16.036386 | 21.440403 | -3.305603  |
| H  | 16.664047 | 20.572193 | -3.051654  |
| H  | 15.098975 | 21.097826 | -3.756598  |
| H  | 15.819361 | 22.017729 | -2.393470  |
| Ni | 25.983296 | 26.171318 | -8.593515  |
| S  | 27.572615 | 25.107266 | -7.485488  |
| S  | 26.782656 | 26.155040 | -10.638854 |
| S  | 22.884094 | 26.949379 | -5.523354  |
| S  | 25.329094 | 27.319986 | -11.651288 |
| N  | 25.587505 | 25.718093 | -5.751315  |
| N  | 25.080414 | 26.224352 | -6.933322  |
| N  | 24.428842 | 27.119648 | -9.169198  |
| C  | 23.903250 | 26.823323 | -6.912323  |
| N  | 23.534083 | 27.420882 | -8.118158  |
| H  | 22.541707 | 27.326638 | -8.357234  |
| N  | 27.235962 | 24.355095 | -4.876542  |
| H  | 26.533874 | 23.983700 | -4.216019  |
| O  | 21.391535 | 30.433055 | -15.532093 |
| C  | 28.565791 | 23.935040 | -4.669578  |
| C  | 26.751006 | 25.081945 | -5.927474  |
| C  | 24.177229 | 27.638017 | -10.355173 |
| N  | 23.086128 | 28.446265 | -10.575058 |

|   |           |           |            |
|---|-----------|-----------|------------|
| H | 22.832391 | 29.023767 | -9.770599  |
| C | 21.974126 | 30.861529 | -13.184970 |
| H | 21.771679 | 31.929008 | -13.254516 |
| C | 21.807990 | 30.017937 | -14.293307 |
| O | 32.511340 | 22.724723 | -3.912362  |
| C | 22.688128 | 28.964042 | -11.836946 |
| C | 31.195393 | 23.061667 | -4.124147  |
| C | 28.799214 | 22.710754 | -4.024869  |
| H | 27.948483 | 22.092182 | -3.734477  |
| C | 22.067880 | 28.642452 | -14.159598 |
| H | 21.914629 | 27.987883 | -15.018886 |
| C | 22.422052 | 30.331705 | -11.970469 |
| H | 22.565643 | 30.995738 | -11.115814 |
| C | 30.099070 | 22.274983 | -3.744824  |
| H | 30.239435 | 21.319585 | -3.241314  |
| C | 22.487881 | 28.117760 | -12.941985 |
| H | 22.647028 | 27.043870 | -12.843429 |
| C | 30.968490 | 24.293975 | -4.761663  |
| H | 31.823825 | 24.913731 | -5.036436  |
| C | 29.673758 | 24.730916 | -5.020534  |
| H | 29.518851 | 25.700670 | -5.491947  |
| C | 21.116675 | 31.835749 | -15.699335 |
| H | 22.016103 | 32.440521 | -15.507217 |
| H | 20.302230 | 32.161469 | -15.034295 |
| H | 20.809245 | 31.953075 | -16.743748 |
| C | 32.769518 | 21.474393 | -3.251314  |
| H | 32.330538 | 21.461370 | -2.241580  |
| H | 33.859696 | 21.397153 | -3.179967  |
| H | 32.375859 | 20.627889 | -3.835092  |
| H | 24.126901 | 24.495172 | -4.475398  |
| O | 23.813593 | 22.918769 | -4.746857  |
| C | 24.536012 | 22.239911 | -3.955260  |
| C | 24.053381 | 20.749426 | -3.813462  |
| O | 25.525685 | 22.575388 | -3.278068  |
| F | 24.991465 | 19.943467 | -3.251884  |
| F | 22.941507 | 20.680689 | -3.021074  |
| F | 23.722646 | 20.196717 | -5.014718  |
